1 Myocardial *Notch-Rbpj* deletion does not affect heart development or function

2  
3 Short title: NOTCH-RBPJ is dispensable in the myocardium

4  
5  
6  
7  
8  
9 Alejandro Salguero-Jiménez<sup>1,2</sup>, Joaquim Grego-Bessa<sup>1,2</sup>, Gaetano D'Amato<sup>1,2,3</sup>,

10 Luis J. Jiménez-Borreguero<sup>4</sup> & José Luis de la Pompa<sup>1,2,\*</sup>

11  
12  
13 <sup>1</sup> Intercellular Signaling in Cardiovascular Development & Disease Laboratory,  
14 Centro Nacional de Investigaciones Cardiovasculares Carlos III (CNIC), 28029 Madrid,  
15 SPAIN

16 <sup>2</sup> CIBER CV, 28029 Madrid, SPAIN

17 <sup>3</sup> Department of Biology, Stanford University, Stanford, CA, USA.

18 <sup>4</sup> Instituto de Investigación Sanitaria Hospital La Princesa, 28006 Madrid, SPAIN

19  
20  
21 \* Corresponding author.

22 E-mail: [jlpompa@cnic.es](mailto:jlpompa@cnic.es) (JLDLP)

23

24

25

## 26 **Abstract**

27 During vertebrate cardiac development NOTCH signaling activity in the endocardium is essential for the crosstalk  
28 between endocardium and myocardium that initiates ventricular trabeculation and valve primordium formation.  
29 This crosstalk leads later to the maturation and compaction of the ventricular chambers and the morphogenesis of  
30 the cardiac valves, and its alteration may lead to disease. Although endocardial NOTCH signaling has been shown  
31 to be crucial for heart development, its physiological role in the myocardium has not been clearly established.  
32 Here we have used a genetic strategy to evaluate the role of NOTCH in myocardial development. We have  
33 inactivated the unique and ubiquitous NOTCH effector RBPJ in the early cardiomyocytes progenitors, and  
34 examined its consequences in cardiac development and function. Our results demonstrate that mice with *cTnT-*  
35 *Cre*-mediated myocardial-specific deletion of *Rbpj* develop to term, with homozygous mutant animals showing  
36 normal expression of cardiac development markers, and normal adult heart function. Similar observations have  
37 been obtained after *Notch1* deletion with *cTnT-Cre*. We have also deleted *Rbpj* in both myocardial and endocardial  
38 progenitor cells, using the *Nkx2.5-Cre* driver, resulting in ventricular septal defect (VSD), double outlet right  
39 ventricle (DORV), and bicuspid aortic valve (BAV), due to NOTCH signaling abrogation in the endocardium of  
40 cardiac valves territories. Our data demonstrate that NOTCH-RBPJ inactivation in the myocardium does not affect  
41 heart development or adult cardiac function.

42

43

44

## 45 Introduction

46

47 The heart is the first organ to form and function during vertebrate development. At embryonic day 7.0 (E7.0) in  
48 the mouse, cardiac progenitor cells, migrating from the primitive streak, reach the head folds on either side of the  
49 midline (1) and by E8.0, fuse and form the primitive heart tube (2). The heart tube consists internally of the  
50 endocardium, that is separated from the primitive myocardium by an extracellular matrix termed cardiac jelly (3).  
51 The NOTCH signaling pathway is crucial for the endocardial-myocardial interactions that regulate the patterning,  
52 growth and differentiation of chamber and non-chamber tissues that will develop from E8.5 onwards (4-8). The  
53 main components of the pathway are the single-pass transmembrane NOTCH receptors (NOTCH1-4 in mammals)  
54 that interact with membrane-bound ligands of the JAGGED (JAG1 and JAG2) and DELTA families (DELTA  
55 LIKE1, 3 and 4), expressed in neighboring cells (9, 10). Ligand-receptor interactions leads to three consecutive  
56 cleavage events that generate the NOTCH intracellular domain (NICD), which can translocate to the nucleus of  
57 the signaling-receiving cell (11). In the nucleus, NICD binds directly to the DNA-binding protein CSL  
58 (CBF1/RBPJ/Su(H)/Lag1) (12) and recruits the co-activator Mastermind-like (13, 14). In the absence of NIICD,  
59 ubiquitously expressed RBPJ (recombination signal binding protein for immunoglobulin kappa J region) may act  
60 as a transcriptional repressor (15). The best characterized NOTCH targets in the heart are the HEY family of basic  
61 helix-loop-helix (bHLH) transcriptional repressors (16), although various other cardiac-specific targets have  
62 been described (4, 17-19). Functional studies in *Xenopus* or in *Rbpj*-targeted mouse embryonic stem cells have  
63 shown that NOTCH suppresses cardiomiogenesis (20, 21), although studies with targeted mutant mice have  
64 demonstrated an essential requirement for NOTCH in cardiac development only after heart tube formation (around  
65 E8.5) (22, 23).

66 One of the first sign of cardiac chamber development is the appearance of trabeculae at E9.0-9.5 (24).  
67 Trabeculae are myocardial protrusions covered by endocardium that grow towards the ventricular lumen, and  
68 serve to facilitate oxygen exchange and nourishment between the blood and the developing heart. The ligand  
69 DLL4 and the active NOTCH1 receptor are expressed in the endocardium prior to the onset of trabeculation (4,  
70 25). DLL4-NOTCH1 signaling is reflected by the endocardial expression of the CBF:H2B-Venus transgenic  
71 NOTCH reporter in mice (17). Conditional inactivation of *Dll4*, *Notch1* or *Rbpj* in the endocardium, results in  
72 very similar phenotypes (more severe in *Rbpj* mutants) consisting of ventricular hypoplasia and impaired

73 trabeculation (4, 17, 26), while myocardial deletion of *Jag1* does not affect trabeculation (17). Later, NOTCH1  
74 signaling in the endocardium is activated in a temporal sequence from the myocardium by the JAGGED1/2  
75 ligands in a MIB1-dependent manner, to sustain ventricular compaction and maturation (17, 27). Conditional  
76 myocardial deletion of *Mib1* or combined inactivation of *Jag1* and *Jag2* abrogates endocardial NOTCH activity,  
77 and leads to abnormally thin compact myocardium and large and non-compacted trabeculae, a phenotype strongly  
78 reminiscent of a cardiomyopathy termed left ventricular non-compaction (LVNC) (17, 27). Thus, endocardial  
79 NOTCH signaling and its downstream effectors are essential for the endocardium-to-myocardium signaling that  
80 regulates chamber patterning and growth (28-30). Endocardial NOTCH activity is also crucial for development  
81 and morphogenesis of the cardiac valves (5, 18, 29, 31-37). NOTCH receptors or transgenic reporter lines are  
82 expressed in the endocardium, coronary vessels endothelium and smooth muscle cells (17, 25, 38, 39). There is  
83 not clear evidence of endogenous NOTCH expression or activity in the embryonic myocardium, and despite  
84 elegant ectopic expression experiments have reported a function for NOTCH in cardiomyocytes (40, 41), a  
85 physiological role for NOTCH in the developing myocardium has not been clearly demonstrated *in vivo*.

86 To address this question, we have conditionally inactivated the NOTCH effector RBPJ in the myocardium  
87 using two early-acting myocardial drivers, and examined its consequences in heart development. We find that  
88 *cTnT-Cre* mediated myocardial-specific deletion of *Rbpj* does not affect NOTCH signaling in the endocardium,  
89 heart development or adult heart function. In contrast, while *Nkx2.5-Cre* mediated *Rbpj* inactivation in the  
90 myocardium does not affect cardiac development and structure, *Rbpj* inactivation in valve endocardial cells  
91 disrupts valve morphogenesis. Our data demonstrate that myocardial NOTCH-RBPJ is not required for cardiac  
92 development or function, reinforcing the notion that physiological NOTCH-RBPJ signaling occurs in the  
93 endocardium, endothelium and smooth muscle cells of the developing heart.

## 94 Results and Discussion

95 We first compared expression of the NOTCH effector RBPJ to the pattern of NOTCH activation in the  
96 E12.5 heart. RBPJ was widely expressed in the nucleus of endocardial, myocardial and epicardial cells (Fig 1a-  
97 a'), while NOTCH1 activity was restricted to the endocardium (Fig 1b-b'). Expression of the NOTCH transgenic  
98 reporter *CBF:H2B-Venus* in endocardial cells indicated that NOTCH activity was restricted to the endocardium  
99 (Fig 1c-c').

100

101 **Fig 1. RBPJ is ubiquitously expressed in the nucleus of cardiac cells, while NOTCH activity is restricted to**  
102 **the endocardium during cardiac development.** (a-a') RBPJ (red) and (b-b') N1ICD (red) nuclear  
103 immunostaining in wild type (WT) E12.5 cardiac sections. (c-c') *CBF:H2B-Venus* reporter line expression (green)  
104 in E12.5 cardiac sections. The myocardium is cTnT-counterstained (green in a-b', red in c-c'). White arrows  
105 indicate cardiomyocytes, white arrowheads point to endocardial cells, and the thick arrow in (a') indicates  
106 epicardial RBPJ expression. Note that cardiomyocytes do not express *CBF:H2B-Venus* (c,c'). Scale bars: a-c,  
107 200µm, a'-c', 50µm.

108 We then generated myocardial-specific conditional mutants by breeding *Rbpj<sup>fllox/fllox</sup>* mice (42) with *cTnT-*  
109 *Cre<sup>tg/+</sup>* mice, which express the CRE recombinase specifically in cardiomyocytes from E8.0 onwards (43). At  
110 E16.5, the heart of *Rbpj<sup>fllox</sup>;cTnT-Cre* (*Rbpj<sup>fllox/fllox</sup>;cTnT<sup>Cre/+</sup>*) embryos was indistinguishable from control  
111 (*Rbpj<sup>fllox/fllox</sup>;cTnT<sup>+/+</sup>*) littermates (Fig 2a-b'), and compact and trabecular myocardium thickness was similar in  
112 both genotypes (Fig 2c). Immunostaining confirmed full myocardial RBPJ deletion in E16.5 *Rbpj<sup>fllox</sup>;cTnT-Cre*  
113 embryos (Fig 2d-e'). Thus, while in control embryos RBPJ was found in the nucleus of both endocardium and  
114 myocardium (Fig 2d-d'), it was not detected in cardiomyocytes of *Rbpj<sup>fllox</sup>;cTnT-Cre* embryos while endocardial  
115 RBPJ expression was normal (Fig 2e-e').

116

117 **Fig 2. Myocardial *Rbpj* deletion does not affect ventricular development and structure.** (a-b') Hematoxylin  
118 and eosin (H&E) staining of heart sections from control and *Rbpj<sup>fllox</sup>;cTnT-Cre* E16.5 embryos. (c) Quantification  
119 of compact myocardium (CM) and trabecular myocardium (TM) thickness in E16.5 control and *Rbpj<sup>fllox</sup>;cTnT-*  
120 *Cre* embryos. LV CM control = 146.4 ± 2.1 µm, LV CM mutant = 143.4 ± 8.4 µm, RV CM control = 89.6 ± 9.8

121  $\mu\text{m}$ , RV CM mutant =  $84.7 \pm 5.5 \mu\text{m}$ , LV TM control =  $142.2 \pm 3.5 \mu\text{m}$ , LV TM mutant =  $142.5 \pm 5.7 \mu\text{m}$ , RV  
122 TM control =  $117.0 \pm 5.5 \mu\text{m}$ , RV TM mutant =  $115.5 \pm 7.6 \mu\text{m}$  (Data are mean  $\pm$  s.e.m;  $n = 5$  control embryos  
123 and  $n = 7$  mutant embryos;  $P < 0.05$  by Student's  $t$ -test; n.s., not significant). (d-e'') RBPJ (red) immunostaining  
124 of control and *Rbpj<sup>fllox</sup>;cTnT-Cre* E16.5 cardiac sections, myosin heavy chain (MF20, green), and isolectin B4  
125 (IB4, white). White arrows indicate cardiomyocytes; white arrowheads point to endocardial cells. Scale bars:  
126  $200\mu\text{m}$  in a,a',d;  $100\mu\text{m}$  in d';  $25\mu\text{m}$  in d''.

127

128 Genetic manipulation of NOTCH elements leading to signal inactivation in the endocardium, disrupts  
129 myocardial patterning and chamber maturation (17, 27). We analyzed if ventricular patterning was affected after  
130 deletion of RBPJ in the myocardium. E16.5 *Rbpj<sup>fllox</sup>;cTnT-Cre* embryos showed normal expression of both  
131 compact (*Hey2*) (44-46) and trabecular myocardial markers (*Bmp10* (47), *Cx40* (48)) (Fig 3a-f), indicating that  
132 myocardial patterning did not require myocardial RBPJ.

133

134 **Fig 3. Expression pattern of compact and trabecular myocardium markers, NOTCH target genes, and**  
135 **fibrosis marker staining is normal in *Rbpj<sup>fllox</sup>;cTnT-Cre* embryos, while *Vegf* is increased.** *In situ*  
136 hybridization (ISH) of *Hey2* (a-b), *Bmp10* (c-d), *Cx40* (e-f), *Hey1* (g-h), *HeyL* (i-j), *Vegfa* (k-l) and *Fabp4* (m-n)  
137 in E16.5 *Rbpj<sup>fllox</sup>;cTnT-Cre* and control hearts. (o) *Vegfa* expression quantification from *Vegfa* ISH. E16.5  
138 *Rbpj<sup>fllox</sup>;cTnT-Cre* and control cardiac sections stained with Masson's Trichrome (MT), (p-q); Periodic acid-Schiff  
139 (PAS), (r-s), and Sirius Red (SR), (t-u). Scale bar is  $200\mu\text{m}$ .

140

141 Canonical NOTCH signaling requires NICD binding to RBPJ in the nucleus to activate target genes  
142 expression (11). The Notch target genes *Hey1* and *HeyL* are expressed in both endocardium and coronaries  
143 endothelium of E16.5 wild type embryos (Fig 3g-j). The endothelial-endocardial pattern of *Hey1* and *HeyL*  
144 expression was maintained E16.5 *Rbpj<sup>fllox</sup>;cTnT-Cre* embryos, indicating that *Rbpj* deletion in the myocardium did  
145 not affect Notch targets expression in the heart. These results are consistent with the data showing that NOTCH  
146 activity in the heart is restricted to endocardium (Figure 1c,c') and coronaries endothelium, and that physiological  
147 NOTCH activity does not occur in the embryonic myocardium (4, 17, 25).

148 A previous report in which *Rbpj* was inactivated in the myocardium using the  *$\alpha$ Mhc-Cre* driver (49)  
149 showed that myocardial RBPJ represses hypoxia-inducible factors (HIFs) to negatively regulate *Vegfa* expression  
150 in a NOTCH-independent manner (50). *In situ* hybridization of *Vegfa* in E16.5 *Rbpj<sup>fllox</sup>;cTnT-Cre* embryos showed  
151 a small but significant increase of *Vegfa* transcription in the ventricular wall of mutant embryos (Fig 3k-l, o),  
152 supporting previous observations (50). VEGFA positively regulates the formation of blood vessels in the  
153 ventricles (51). Thus, we analyzed the expression of the coronary vessels marker *Fabp4* (52) and observed a  
154 similar pattern and intensity in E16.5 *Rbpj<sup>fllox</sup>;cTnT-Cre* and control embryos (Fig 3m-n) suggesting that coronaries  
155 development was normal. Thus, in agreement with Díaz-Trelles et al., these results revealed a NOTCH-  
156 independent role for RBPJ in the negative regulation of *Vegfa* in the myocardium.

157 Cardiomyopathies may result in the appearance of fibrosis and accumulation of collagen fibers in the  
158 myocardium, due to defective vascularization or loss of metabolic homeostasis (53). We performed Masson's  
159 Trichrome and Sirius Red staining in E16.5 *Rbpj<sup>fllox</sup>;cTnT-Cre* mutant hearts, and found no signs of fibrosis (Fig.  
160 3p-s). Periodic Acid-Schiff (PAS) staining detects glycogen accumulation that could be induced by inflammation,  
161 but PAS staining was relatively normal in E16.5 *Rbpj<sup>fllox</sup>;cTnT-Cre* hearts (Fig 3t-u). These results indicated that  
162 *Rbpj* deletion in the embryonic myocardium does not affect myocardial fetal development.

163 *Rbpj<sup>fllox</sup>;cTnT-Cre* mutant mice reached adulthood in similar proportions than control littermates.  
164 Genotyping of neonatal and adult litters showed that all genotypes appeared at the expected Mendelian  
165 proportions (Table 1), indicating that RBPJ loss in the myocardium did not compromise postnatal viability.  
166 Morphological analysis of 6-month old *Rbpj<sup>fllox</sup>;cTnT-Cre* adults revealed normal heart structure compared to  
167 control animals (Fig 4a,b). In order to detect potential physiological impairments in the heart, we analyzed cardiac  
168 function by echocardiography (Fig 4e). Ejection fraction (EF%) and fractional shortening (FS%) were similar in  
169 wild type and mutant mice (Fig 4e). The diastolic function, indicated by the E/A ratio (ratio of early diastolic  
170 velocity to atrial velocity) (54), was also normal. Physiological measurements indicate that ventricular volumetric  
171 and mass parameters were normal compared to control mice. Overall, the echocardiography study indicates that  
172 myocardial *Rbpj* inactivation does not affect postnatal heart growth and adult myocardial function. We confirmed  
173 these results by inactivating *Notch1* with the *cTnT-Cre* driver. Six-month old *Notch1<sup>fllox</sup>;cTnT-Cre* adult hearts  
174 did not show any morphological phenotypes compared to control animal (Fig. 4c,d). In terms of heart function,  
175 *Notch1<sup>fllox</sup>;cTnT-Cre* mice exhibited a slightly better cardiac performance with a minor but significantly increased

176 EF% and FS% compared to control mice (Fig 4f). The diastolic function was normal, as it was in *Rbpj<sup>fllox</sup>;cTnT-*  
 177 *Cre*.

178

179 **Table 1. Myocardium-specific *Rbpj<sup>fllox</sup>* mutants are viable and reach adulthood.** Distribution of the different  
 180 genetic combinations resulted from the intercross of *Rbpj<sup>fllox/+</sup>; cTnT<sup>Cre/+</sup>* males with *Rbpj<sup>fllox/fllox</sup>* females  
 181 compared to the expected Mendelian proportions.

| Age      | Litters | <i>RBPJk<sup>fllox/fllox</sup>;</i><br><i>cTnT<sup>Cre/+</sup></i> | <i>RBPJk<sup>fllox/fllox</sup>;</i><br>+/+ | <i>RBPJk<sup>fllox/+</sup>;</i><br><i>cTnT<sup>Cre/+</sup></i> | <i>RBPJk<sup>fllox/+</sup>;</i><br>+/+ |
|----------|---------|--------------------------------------------------------------------|--------------------------------------------|----------------------------------------------------------------|----------------------------------------|
| E16.5    | 6       | 13 (29,5%)                                                         | 8 (18,2%)                                  | 13 (29,5%)                                                     | 10 (22,7%)                             |
| P0       | 3       | 7 (25,9%)                                                          | 4 (14,8%)                                  | 9 (33,3%)                                                      | 7 (25,9%)                              |
| 6 months | 18      | 38 (26,5%)                                                         | 37 (25,8%)                                 | 35 (24,5%)                                                     | 33 (23,2%)                             |
| Expected |         | 25%                                                                | 25%                                        | 25%                                                            | 25%                                    |

182

183

184 **Fig 4. Cardiac structure and function are preserved in both *Rbpj<sup>fllox</sup>;cTnT-Cre* and *Notch1<sup>fllox</sup>;cTnT-Cre***

185 **mice.** (a-d) H&E staining of cardiac sections from six months-old *Rbpj<sup>fllox</sup> cTnT-Cre* and *Notch1<sup>fllox</sup>;cTnT-Cre* mice

186 and their control littermates. (e,f) Echocardiography analysis of six months-old *Rbpj<sup>fllox</sup>;cTnT-Cre* and

187 *Notch1<sup>fllox</sup>;cTnT-Cre* mice. For *Rbpj<sup>fllox</sup>; cTnT-Cre*: EF% control = 54.5 ± 2.4, EF% mutant= 59.6 ± 1.7, FS%

188 control = 28.3 ± 1.6, FS% mutant = 31.4 ± 1.1, E/A control = 1.7 ± 0.1, E/A mutant = 1.7 ± 0.1, Cardiac Output/TL

189 control = 1.5 ± 0.2, Cardiac Output/TL mutant = 1.4 ± 0.2, Stroke volume/TL control = 3.2 ± 0.3, Stroke

190 volume/TL mutant = 2.8 ± 0.2, LV mass/TL control = 5.7 ± 0.3, LV mass/TL mutant = 4.9 ± 0.4. *Notch1<sup>fllox</sup>;cTnT-*

191 *Cre*: EF% control = 40.8 ± 1.6, EF% mutant = 48.21 ± 2.0, FS% control = 19.7 ± 0.9, FS% mutant = 23.8 ± 1.2,

192 E/A control = 1.9 ± 0.2, E/A mutant = 1.8 ± 0.4, Cardiac Output/TL control = 0.9 ± 0.1, Cardiac Output/TL mutant

193 = 0.9 ± 0.1, Stroke Volume/TL control = 2.0 ± 0.1, Stroke Volume/TL mutant = 1.8 ± 0.1, LV mass/TL control =

194 4.9 ± 0.1, LV mass/TL mutant = 4.1 ± 0.2. (g) Electrocardiogram analysis of control and *Rbpj<sup>fllox</sup>; cTnT-Cre* 6

195 months old mice. PR control = 44.8 ± 1.9, PR mutant = 46.7 ± 1.4, QRS control = 13.9 ± 0.6, QRS mutant = 14.7

196 ± 0.4, QT control = 47.1 ± 2.0, QT mutant = 43.3 ± 2.5. Data are mean ± s.e.m. For echo, *n* = 15 *Rbpj<sup>fllox</sup>* control

197 mice, *n* = 16 *Rbpj<sup>fllox</sup>;cTnT-Cre* mutant mice, *n* = 8 *Notch1<sup>fllox</sup>* control mice, *n* = 8 *Notch1<sup>fllox</sup>;cTnT-Cre* mutant mice.

198 For ECG, *n* = 6 control mice and *n* = 6 mutant mice. *P*<0.05 by Student's *t*-test; n.s., not significant; \**P*<0.05;

199 \*\**P*<0.01. EF, ejection fractions; FS, fractional shortening; TL, tibial length; LV, left ventricle. Scale bars is

200 600µm.



201 Previous reports suggested that ectopic myocardial Notch signaling directs the differentiation of  
 202 cardiomyocytes towards specialized conduction cells *in vitro* (41). Although the expression of the ventricular  
 203 conduction system marker *Cx40* was normal in E16.5 *Rbpj<sup>flox</sup>;cTnT-Cre* mutant embryos (Fig 3e-f), we further  
 204 analyzed cardiac conduction system activity of *Rbpj<sup>flox</sup>;cTnT-Cre* adult mice. Electrocardiogram showed no  
 205 significant differences neither in the main intervals PR and QT nor in the QRS complex duration compared to  
 206 control mice, suggesting that the conduction system is fully functional in *Rbpj<sup>flox</sup>;cTnT-Cre* adult mice (Fig 4g).

207 To further confirm that myocardial RBPJ is dispensable for cardiac development and function, we used a  
 208 second early myocardial driver *Nkx2.5-Cre*, active in the myocardium and in a subset of endocardial cells from  
 209 E7.5 onwards (55). Morphological analysis of E16.5 *Rbpj<sup>flox/flox</sup>;Nkx2.5<sup>Cre/+</sup>* (*Rbpj<sup>flox</sup>;Nkx2.5-Cre*) embryos  
 210 revealed the presence of a membranous ventricular septal defect (VSD, Fig 5a-b) and dysmorphic valves (Fig 5c-  
 211 d). Among thirteen *Rbpj<sup>flox</sup>;Nkx2.5-Cre* mutants examined, twelve (92%) showed membranous VSD, twelve  
 212 (92%) showed double outlet right ventricle (DORV), in which the aorta is connected to the right ventricle instead  
 213 of to the left one (Fig 5e-f). Seven mutants (54%) had bicuspid aortic valve (BAV), characterized by either right  
 214 to non-coronary (75% of cases) or right to left (25% of cases) morphology and resulting in a two-leaflet valve  
 215 instead of the normal three-leaflet valve (Fig 5c-d). *Rbpj<sup>flox</sup>;Nkx2.5-Cre* mutant embryos developed a normal  
 216 compact and trabecular myocardium layers, with a thickness similar to controls (Fig 5g). *Rbpj<sup>flox</sup>;Nkx2.5-Cre*  
 217 mutants showed perinatal lethality and died around postnatal day 0 (P0; Table 2).

218 **Table 2. *Rbpj<sup>flox</sup>; Nkx2.5-Cre* embryos show perinatal lethality.** Distribution of the different genetic  
 219 combinations resulted from the intercross of *Rbpj<sup>flox/+</sup>; Nkx2.5<sup>Cre</sup>* males with *Rbpj<sup>flox/flox</sup>* females compared to the  
 220 expected Mendelian proportions.

221

| Age      | Litters | <i>Rbpj<sup>flox/flox</sup>;<br/>Nkx2.5<sup>Cre/+</sup></i> | <i>Rbpj<sup>flox/flox</sup>;<br/>+/+</i> | <i>Rbpj<sup>flox/+</sup>;<br/>Nkx2.5<sup>Cre/+</sup></i> | <i>Rbpj<sup>flox/+</sup>;<br/>+/+</i> |
|----------|---------|-------------------------------------------------------------|------------------------------------------|----------------------------------------------------------|---------------------------------------|
| E14.5    | 5       | 9 (27,3%)                                                   | 8 (24,2%)                                | 9 (27,3%)                                                | 7 (21,2%)                             |
| E16.5    | 7       | 11 (22%)                                                    | 10 (20%)                                 | 17 (34%)                                                 | 12 (24%)                              |
| P0       | 5       | 4 (11,1%)                                                   | 14 (42,2%)                               | 9 (27,3%)                                                | 6 (18,2%)                             |
| P1       | 5       | 0 (0%)                                                      | 14 (46,7%)                               | 8 (26,7%)                                                | 8 (26,7%)                             |
| Expected |         | 25%                                                         | 25%                                      | 25%                                                      | 25%                                   |

222

223

224 **Figure 5. *Nkx2.5-Cre*-mediated *Rbpj* deletion results in ventricular septal defect, bicuspid aortic valve and**  
225 **double outlet right ventricle.** (a-f) H&E staining of cardiac sections from E16.5 control and *Rbpj<sup>lox</sup>;Nkx2.5-Cre*  
226 embryos showing ventricular septal defect (a,b), bicuspid aortic valve (c,d), and double outlet right ventricle (e,f).  
227 (g) Quantification of compact myocardium (CM) and trabecular myocardium (TM) thickness in E16.5 control  
228 and *Rbpj<sup>lox</sup>; Nkx2.5-Cre* embryos. LV CM control =  $142.8 \pm 4.5 \mu\text{m}$ ; LV CM mutant =  $167.0 \pm 16.8 \mu\text{m}$ ; RV CM  
229 control =  $86.2 \pm 11.4 \mu\text{m}$ , RV CM mutant =  $99.0 \pm 19.0 \mu\text{m}$ ; LV TM control =  $144.3 \pm 3.7 \mu\text{m}$ , LV TM mutant =  
230  $151.1 \pm 12.2 \mu\text{m}$ ; RV TM control =  $116.2 \pm 55.5 \mu\text{m}$ , RV TM mutant =  $131.9 \pm 6.5 \mu\text{m}$  (Data are mean  $\pm$  s.e.m,  
231  $n= 5$  control embryos and  $n=3$  mutant embryos;  $P<0,05$  by Student's *t*-test; n.s, not significant). (h-j) *Nkx2.5-Cre*  
232 lineage tracing analysis using *mTmG* mice show recombination in the entire heart at E9.5 (h), including the  
233 outflow track (OFT) endocardium (i). At E16.5, *mTmG;Nkx2.5-Cre* shows partial recombination both at the  
234 mitral valve endocardium and in endocardium-derived mesenchyme (j). (k-n') RBPJ (red), myosin heavy chain  
235 (MF20, green) and isolectin B4 (IB4, white) immunostaining in E16.5 control and *Rbpj<sup>lox</sup>;Nkx2.5-Cre* embryos.  
236 White arrows indicate cardiomyocytes; white arrowheads point to endocardial cells. Scale bar: 200 $\mu\text{m}$  in a-f, k,l;  
237 100 $\mu\text{m}$  in h,j,k',m,n; 50 $\mu\text{m}$  in i; 25 $\mu\text{m}$  in m'.

238

239 To determine the precise contribution of *Nkx2.5*-expressing cells to the developing heart, we took  
240 advantage of the *mTmG* system in which following CRE-mediated excision, the *mTomato* transgene is removed  
241 so that the *CAG* promoter drives the expression of membrane localized EGFP (56). Lineage tracing analysis of  
242 *mTmG;Nkx2.5-Cre* mice revealed both myocardial and endocardial contribution of CRE-expressing cells (Fig  
243 5h-j), including partial recombination in the E9.5 outflow track (OFT) endocardium (Fig 5i) and in the mitral  
244 valve endocardium at E16.5 (Fig 5j). RBPJ immunostaining in E16.5 control and *Rbpj<sup>lox</sup>;Nkx2.5-Cre* embryos  
245 showed efficient RBPJ abrogation throughout the ventricular myocardium ( $99.98 \pm 0.02$  of cardiomyocytes  
246 recombined), while RBPJ was preserved in the majority of ventricular endocardial cells ( $29.06 \pm 9.67\%$  of  
247 endocardial cells recombined; Fig. 5k-l'). In contrast, in endocardial cells overlying the valves, RBPJ depletion  
248 was significantly more efficient ( $76.91 \pm 6.48 \%$ ;  $P < 0.01$  by Student's *t*-test) (Fig. 5m-n'). Our results are in  
249 agreement with previous reports showing that NOTCH signaling abrogation by deletion of *Notch1* or *Jagged1*,  
250 using the *Nkx2.5-Cre* driver leads to VSD, DORV and BAV (18), demonstrating the requirement of endocardial

251 Notch signaling for valve morphogenesis, and suggesting that the lethality observed in *Rbpj<sup>lox</sup>;Nkx2.5-Cre* mutant  
252 mice was very likely due to *Rbpj* inactivation in valve endocardium.

253         These results demonstrate that myocardial inactivation of *Rbpj* in *cTnT-Cre;Rbpj<sup>lox</sup>* mice does not affect  
254 heart development and structure, nor does impair adult heart function, as it occurs with NOTCH signaling  
255 inactivation in the endocardium (4, 17, 18, 26, 30, 57). In contrast, *Rbpj* deletion driven by the *Nkx2.5-Cre* driver  
256 leads to VSD, DORV and BAV, phenotypes due to *Nkx2.5*-mediated CRE activity in valve endocardial cells in  
257 which RBPJ mediates NOTCH signaling, with VSD being the likely cause of perinatal lethality of these mutants.

258

## 259 **Conclusions**

260         Our data indicate that: 1) Targeted inactivation of *Notch-Rbpj* in the myocardium does not affect cardiac  
261 development or function; 2) myocardial RBPJ does not mediate NOTCH signaling; 3) myocardial *Rbpj*  
262 inactivation does not affect endocardial NOTCH activity; 4) NOTCH does not play a direct role in the  
263 myocardium. Thus, the physiological role of NOTCH-RBPJ signaling in cardiac development is restricted to the  
264 endocardium, coronary endothelium and epicardium. Our data also suggest that the previously described roles for  
265 myocardial NOTCH in which the pathway was experimentally overactivated in the myocardium with various  
266 drivers (*αMhc-Cre*, *Nkx2.5-Cre*, *Mef2c-Cre*) (40, 58, 59) do not represent physiological roles for NOTCH  
267 signaling, but may offer experimental options for the manipulation of cardiac progenitors and/or lineages in the  
268 diseased heart.

269

## 270 **Materials and Methods**

### 271 **Mouse strains and genotyping**

272 Animal studies were approved by the CNIC Animal Experimentation Ethics Committee and by the Community  
273 of Madrid (Ref. PROEX 118/15). All animal procedures conformed to EU Directive 2010/63EU and  
274 Recommendation 2007/526/EC regarding the protection of animals used for experimental and other scientific  
275 purposes, enforces in Spanish law under Real Decreto 1201/2005. Mouse strains were *CBF:H2B-Venus* (60),  
276 *Rbpj<sup>fllox</sup>* (42), *cTnT-Cre* (43), *Nkx2.5-Cre* (55), *Notch1<sup>fllox</sup>* (61), *mTmG* (56). Details of genotyping will be provided  
277 on request.

### 278 **Tissue processing, histology and *in situ* hybridization**

279 Embryos were fixed in 4% paraformaldehyde (PFA) at 4°C overnight. Adult hearts were perfused with Heparin  
280 (5U/ml in PBS) and fixed during 48 hours in PFA 4%. Both embryos and adult samples were embedded in paraffin  
281 following standard protocols. Hematoxylin-eosin (H&E) staining and *in situ* hybridization (ISH) on paraffin  
282 sections were performed as described previously(62) . Masson's trichrome, Sirius Red and PAS (periodic acid-  
283 Schiff) were performed using standard procedures (CNIC Histology Facility). *mTmG;Nkx2.5-Cre* embryos were  
284 fixed in 4% PFA for an hour at room temperature, washed in PBS followed by 1 hour incubation in 30% sucrose  
285 in PBS and embedded in OCT.

### 286 **Immunohistochemistry**

287 Paraffin sections (10 µm) were incubated overnight with primary antibodies, followed by 1h incubation with a  
288 fluorescent-dye-conjugated secondary antibody. RBPJ and N1ICD staining was performed using tyramide signal  
289 amplification (PerkinElmer NEL744B001KT). *CBF:H2B-Venus* expression was detected using anti-GFP  
290 antibody. Antibodies used in this study are: anti-RBPJ (CosmoBio 2ZRBP2, 1:50), anti-Troponin T (DSHB CT3,  
291 1:20) anti-Cleaved Notch1 ICD (Cell Signaling Technology 2421S, 1:100), anti-GFP (Aves Labs GFP-1010,  
292 1:400), and anti-Myosin Heavy Chain MF-20 (DHSB, 1:20). DAPI (Sigma-Aldrich D9542, 1:1000) and Isolectin  
293 B4 glycoprotein (ThermoFisher I32450, 1:100). Confocal images were obtained using Leica SP5 confocal  
294 fluorescence microscope.

### 295 **Quantification of *Rbpj* deletion**

296 Rbpj immunostaining was analyzed using ImageJ software. Rbpj-positive nuclei were divided by the total number  
297 of nuclei (counterstained with DAPI) counted on sections both in the myocardium and endocardium of the valve  
298 and ventricles of 4 different E16.5 *Rbpj<sup>lox</sup>; Nkx2.5-Cre* embryos.

### 299 **Quantification of compact and trabecular myocardium thickness**

300 H&E and images were obtained with an Olympus BX51 microscope. ImageJ software was used for the  
301 measurements, drawing a 10-pixel wide straight line along the width of compact and trabecular myocardium.  
302 Three measurements (in  $\mu\text{m}$ ) of both compact and trabecular myocardium were taken, from both the apex and the  
303 basal region of the ventricle. Left and right ventricles were analyzed separately.

### 304 **Quantification of *Vegfa* expression**

305 *Vegfa* expression was assessed by ISH in paraffin sections. Images of heart sections were obtained with an  
306 Olympus BX51 microscope and analyzed with ImageJ software. Using an inverted gray scale, pixel intensity was  
307 measured throughout the myocardium and a mean pixel intensity was obtained for every heart sections. 7 sections  
308 of each heart at different levels were analyzed and a mean pixel intensity was obtained for each heart.

### 309 **Ultrasound**

310 Left ventricle (LV) function and mass were analyzed by transthoracic echocardiography in 6 months of age mice.  
311 Mice were mildly anaesthetized by inhalation of isoflurane/oxygen (1-2%/98.75%) adjusted to obtain a target  
312 heart rate of  $450 \pm 50$  beats/min and examined using a 30MHz transthoracic echocardiography probe. Images were  
313 obtained with Vevo 2100 (VisualSonics). From these images, cardiac output, stroke volume and LV mass were  
314 calculated. These measurements were normalized by the tibial length of each mice. Ventricular systolic function  
315 was assessed by estimating LV shortening fraction and the ejection fraction. Diastolic function was assessed by  
316 the E/A ratio. We performed a second echocardiography analysis two weeks after the first one and calculate the  
317 mean for each parameter and each mouse.

### 318 **Electrocardiograms**

319 Electrocardiograms were recorded with and MP36 system and analyzed using the Acknowledge 4 software. 6  
320 months old mice were anesthetized by inhalation of isoflurane/oxygen (1-2%/98.75%) adjusted to obtain a target  
321 heart rate of  $450 \pm 50$  beats/min.

### 322 **Statistical analysis**

323 Statistical analysis was carried out using Prism 7 (GraphPad). All statistical test were performed using a two-  
324 sided, unpaired Student's *t*-test. Data are represented as mean  $\pm$ s.e.m. All experiments were carried out with at  
325 least three biological replicates. In the case of adult image analysis by echo and electrocardiogram analysis, the  
326 experimental groups were balanced in terms of age and sex. Animals were genotyped before the experiment and  
327 were caged together and treated in the same way. The experiments were not randomized. For adult image analysis,  
328 the investigators were blinded to allocation during experiments and outcome assessment. All quantifications are  
329 included in Supplementary Table 1.

330

## 331 **References**

332

- 333 1. Buckingham M, Meilhac S, Zaffran S. Building the mammalian heart from two sources of myocardial  
334 cells. *Nat Rev Genet.* 2005;6(11):826-35.
- 335 2. Saga Y, Miyagawa-Tomita S, Takagi A, Kitajima S, Miyazaki J, Inoue T. *MesP1* is expressed in the  
336 heart precursor cells and required for the formation of a single heart tube. *Development.* 1999;126(15):3437-47.
- 337 3. Christoffels VM, Habets PE, Franco D, Campione M, de Jong F, Lamers WH, et al. Chamber formation  
338 and morphogenesis in the developing mammalian heart. *Dev Biol.* 2000;223(2):266-78.
- 339 4. Grego-Bessa J, Luna-Zurita L, del Monte G, Bolos V, Melgar P, Arandilla A, et al. Notch signaling is  
340 essential for ventricular chamber development. *Dev Cell.* 2007;12(3):415-29.
- 341 5. Timmerman LA, Grego-Bessa J, Raya A, Bertran E, Perez-Pomares JM, Diez J, et al. Notch promotes  
342 epithelial-mesenchymal transition during cardiac development and oncogenic transformation. *Genes &*  
343 *development.* 2004;18(1):99-115.
- 344 6. Benedito R, Hellstrom M. Notch as a hub for signaling in angiogenesis. *Exp Cell Res.*  
345 2013;319(9):1281-8.
- 346 7. Gridley T. Notch signaling in vascular development and physiology. *Development.* 2007;134(15):2709-  
347 18.
- 348 8. Luxan G, D'Amato G, MacGrogan D, de la Pompa JL. Endocardial Notch Signaling in Cardiac  
349 Development and Disease. *Circ Res.* 2016;118(1):e1-e18.
- 350 9. Hori K, Sen A, Artavanis-Tsakonas S. Notch signaling at a glance. *J Cell Sci.* 2013;126(Pt 10):2135-40.
- 351 10. Kovall RA, Gebelein B, Sprinzak D, Kopan R. The Canonical Notch Signaling Pathway: Structural and  
352 Biochemical Insights into Shape, Sugar, and Force. *Dev Cell.* 2017;41(3):228-41.
- 353 11. Kopan R, Ilagan MX. The canonical Notch signaling pathway: unfolding the activation mechanism.  
354 *Cell.* 2009;137(2):216-33.
- 355 12. Jarriault S, Brou C, Logeat F, Schroeter EH, Kopan R, Israel A. Signalling downstream of activated  
356 mammalian Notch *Nature.* 1995;377(6547):355-8.
- 357 13. Borggreffe T, Oswald F. The Notch signaling pathway: transcriptional regulation at Notch target genes.  
358 *Cell Mol Life Sci.* 2009;66(10):1631-46.
- 359 14. Kovall RA, Blacklow SC. Mechanistic insights into Notch receptor signaling from structural and  
360 biochemical studies. *Curr Top Dev Biol.* 2010;92:31-71.
- 361 15. Castel D, Mourikis P, Bartels SJ, Brinkman AB, Tajbakhsh S, Stunnenberg HG. Dynamic binding of  
362 RBPJ is determined by Notch signaling status. *Genes & development.* 2013;27(9):1059-71.

- 363 16. Weber D, Wiese C, Gessler M. Hey bHLH transcription factors. *Curr Top Dev Biol.* 2014;110:285-315.
- 364 17. D'Amato G, Luxan G, del Monte-Nieto G, Martinez-Poveda B, Torroja C, Walter W, et al. Sequential  
365 Notch activation regulates ventricular chamber development. *Nature cell biology.* 2016;18(1):7-20.
- 366 18. MacGrogan D, D'Amato G, Travisano S, Martinez-Poveda B, Luxan G, Del Monte-Nieto G, et al.  
367 Sequential Ligand-Dependent Notch Signaling Activation Regulates Valve Primordium Formation and  
368 Morphogenesis. *Circ Res.* 2016;118(10):1480-97.
- 369 19. Krebs LT, Deftos ML, Bevan MJ, Gridley T. The Nrarp gene encodes an ankyrin-repeat protein that is  
370 transcriptionally regulated by the notch signaling pathway. *Dev Biol.* 2001;238(1):110-9.
- 371 20. Ronces MS, McLaughlin KA, Raffin M, Mercola M. Serrate and Notch specify cell fates in the heart  
372 field by suppressing cardiomyogenesis. *Development.* 2000;127(17):3865-76.
- 373 21. Schroeder T, Fraser ST, Ogawa M, Nishikawa S, Oka C, Bornkamm GW, et al. Recombination signal  
374 sequence-binding protein Jkappa alters mesodermal cell fate decisions by suppressing cardiomyogenesis. *Proc*  
375 *Natl Acad Sci U S A.* 2003;100(7):4018-23.
- 376 22. Oka C, Nakano T, Wakeham A, de la Pompa JL, Mori C, Sakai T, et al. Disruption of the mouse RBP-J  
377 kappa gene results in early embryonic death. *Development.* 1995;121(10):3291-301.
- 378 23. Swiatek PJ, Lindsell CE, del Amo FF, Weinmaster G, Gridley T. Notch1 is essential for  
379 postimplantation development in mice. *Genes & development.* 1994;8(6):707-19.
- 380 24. Sedmera D, Pexieder T, Vuillemin M, Thompson RP, Anderson RH. Developmental patterning of the  
381 myocardium. *Anat Rec.* 2000;258(4):319-37.
- 382 25. Del Monte G, Grego-Bessa J, Gonzalez-Rajal A, Bolos V, De La Pompa JL. Monitoring Notch1 activity  
383 in development: Evidence for a feedback regulatory loop. *Dev Dyn.* 2007;236(9):2594-614.
- 384 26. Del Monte-Nieto G, Ramialison M, Adam AAS, Wu B, Aharonov A, D'Uva G, et al. Control of cardiac  
385 jelly dynamics by NOTCH1 and NRG1 defines the building plan for trabeculation. *Nature.*  
386 2018;557(7705):439-45.
- 387 27. Luxan G, Casanova JC, Martinez-Poveda B, Prados B, D'Amato G, MacGrogan D, et al. Mutations in  
388 the NOTCH pathway regulator MIB1 cause left ventricular noncompaction cardiomyopathy. *Nat Med.*  
389 2013;19(2):193-201.
- 390 28. D'Amato G, Luxan G, de la Pompa JL. Notch signalling in ventricular chamber development &  
391 cardiomyopathy. *FEBS J.* 2016.
- 392 29. de Luxan G, D'Amato G, MacGrogan D, de la Pompa JL. Endocardial Notch Signaling in Cardiac  
393 Development and Disease. *Circ Res.* 2015.
- 394 30. VanDusen NJ, Casanovas J, Vincentz JW, Firulli BA, Osterwalder M, Lopez-Rios J, et al. Hand2 is an  
395 essential regulator for two Notch-dependent functions within the embryonic endocardium. *Cell Rep.*  
396 2014;9(6):2071-83.



- 397 31. de la Pompa JL, Epstein JA. Coordinating tissue interactions: notch signaling in cardiac development  
398 and disease. *Dev Cell*. 2012;22(2):244-54.
- 399 32. Luna-Zurita L, Prados B, Grego-Bessa J, Luxan G, del Monte G, Benguria A, et al. Integration of a  
400 Notch-dependent mesenchymal gene program and Bmp2-driven cell invasiveness regulates murine cardiac  
401 valve formation. *J Clin Invest*. 2010;120(10):3493-507.
- 402 33. High F, Epstein JA. Signalling pathways regulating cardiac neural crest migration and differentiation.  
403 *Novartis Found Symp*. 2007;283:152-61; discussion 61-4, 238-41.
- 404 34. High FA, Jain R, Stoller JZ, Antonucci NB, Lu MM, Loomes KM, et al. Murine Jagged1/Notch  
405 signaling in the second heart field orchestrates Fgf8 expression and tissue-tissue interactions during outflow  
406 tract development. *J Clin Invest*. 2009;119(7):1986-96.
- 407 35. Jain R, Engleka KA, Rentschler SL, Manderfield LJ, Li L, Yuan L, et al. Cardiac neural crest  
408 orchestrates remodeling and functional maturation of mouse semilunar valves. *J Clin Invest*. 2011;121(1):422-  
409 30.
- 410 36. Macgrogan D, Luna-Zurita L, de la Pompa JL. Notch signaling in cardiac valve development and  
411 disease. *Birth Defects Res A Clin Mol Teratol*. 2011;91(6):449-59.
- 412 37. Wang Y, Wu B, Farrar E, Lui W, Lu P, Zhang D, et al. Notch-Tnf signalling is required for  
413 development and homeostasis of arterial valves. *Eur Heart J*. 2017;38(9):675-86.
- 414 38. Loomes KM, Taichman DB, Glover CL, Williams PT, Markowitz JE, Piccoli DA, et al.  
415 Characterization of Notch receptor expression in the developing mammalian heart and liver. *Am J Med Genet*.  
416 2002;112(2):181-9.
- 417 39. Uyttendaele H, Marazzi G, Wu G, Yan Q, Sassoon D, Kitajewski J. Notch4/int-3, a mammary proto-  
418 oncogene, is an endothelial cell-specific mammalian Notch gene. *Development*. 1996;122(7):2251-9.
- 419 40. Yang J, Bucker S, Jungblut B, Bottger T, Cinnamon Y, Tchorz J, et al. Inhibition of Notch2 by  
420 Numb/Numbl like controls myocardial compaction in the heart. *Cardiovascular research*. 2012;96(2):276-85.
- 421 41. Rentschler S, Yen AH, Lu J, Petrenko NB, Lu MM, Manderfield LJ, et al. Myocardial Notch signaling  
422 reprograms cardiomyocytes to a conduction-like phenotype. *Circulation*. 2012;126(9):1058-66.
- 423 42. Han H, Tanigaki K, Yamamoto N, Kuroda K, Yoshimoto M, Nakahata T, et al. Inducible gene  
424 knockout of transcription factor recombination signal binding protein-J reveals its essential role in T versus B  
425 lineage decision. *Int Immunol*. 2002;14(6):637-45.
- 426 43. Jiao K, Kulesa H, Tompkins K, Zhou Y, Batts L, Baldwin HS, et al. An essential role of Bmp4 in the  
427 atrioventricular septation of the mouse heart. *Genes & development*. 2003;17(19):2362-7.
- 428 44. Koibuchi N, Chin MT. CHF1/Hey2 plays a pivotal role in left ventricular maturation through  
429 suppression of ectopic atrial gene expression. *Circ Res*. 2007;100(6):850-5.
- 430 45. Sakata Y, Kamei CN, Nakagami H, Bronson R, Liao JK, Chin MT. Ventricular septal defect and  
431 cardiomyopathy in mice lacking the transcription factor CHF1/Hey2. *Proc Natl Acad Sci U S A*.  
432 2002;99(25):16197-202.

- 433 46. Sakata Y, Koibuchi N, Xiang F, Youngblood JM, Kamei CN, Chin MT. The spectrum of cardiovascular  
434 anomalies in CHF1/Hey2 deficient mice reveals roles in endocardial cushion, myocardial and vascular  
435 maturation. *J Mol Cell Cardiol.* 2006;40(2):267-73.
- 436 47. Chen H, Shi S, Acosta L, Li W, Lu J, Bao S, et al. BMP10 is essential for maintaining cardiac growth  
437 during murine cardiogenesis. *Development.* 2004;131(9):2219-31.
- 438 48. Van Kempen MJ, Vermeulen JL, Moorman AF, Gros D, Paul DL, Lamers WH. Developmental changes  
439 of connexin40 and connexin43 mRNA distribution patterns in the rat heart. *Cardiovascular research.*  
440 1996;32(5):886-900.
- 441 49. Gaussin V, Van De Putte T, Mishina Y, Hanks MC, Zwijsen A, Huylebroeck D, et al. Endocardial  
442 cushion and myocardial defects after cardiac myocyte-specific conditional deletion of the bone morphogenetic  
443 protein receptor ALK3. *Proc Natl Acad Sci U S A.* 2002;99(5):2878-83.
- 444 50. Diaz-Trelles R, Scimia MC, Bushway P, Tran D, Monosov A, Monosov E, et al. Notch-independent  
445 RBPJ controls angiogenesis in the adult heart. *Nat Commun.* 2016;7:12088.
- 446 51. Tomanek RJ, Holifield JS, Reiter RS, Sandra A, Lin JJ. Role of VEGF family members and receptors in  
447 coronary vessel formation. *Dev Dyn.* 2002;225(3):233-40.
- 448 52. He L, Tian X, Zhang H, Wythe JD, Zhou B. Fabp4-CreER lineage tracing reveals two distinctive  
449 coronary vascular populations. *J Cell Mol Med.* 2014;18(11):2152-6.
- 450 53. Fan D, Takawale A, Lee J, Kassiri Z. Cardiac fibroblasts, fibrosis and extracellular matrix remodeling  
451 in heart disease. *Fibrogenesis Tissue Repair.* 2012;5(1):15.
- 452 54. Galderisi M. Diastolic dysfunction and diastolic heart failure: diagnostic, prognostic and therapeutic  
453 aspects. *Cardiovasc Ultrasound.* 2005;3:9.
- 454 55. Stanley EG, Biben C, Elefanty A, Barnett L, Koentgen F, Robb L, et al. Efficient Cre-mediated deletion  
455 in cardiac progenitor cells conferred by a 3'UTR-ires-Cre allele of the homeobox gene Nkx2-5. *The*  
456 *International journal of developmental biology.* 2002;46(4):431-9.
- 457 56. Muzumdar MD, Tasic B, Miyamichi K, Li L, Luo L. A global double-fluorescent Cre reporter mouse.  
458 *Genesis.* 2007;45(9):593-605.
- 459 57. Wang Y, Wu B, Chamberlain AA, Lui W, Koirala P, Susztak K, et al. Endocardial to myocardial notch-  
460 wnt-bmp axis regulates early heart valve development. *PloS one.* 2013;8(4):e60244.
- 461 58. Kratsios P, Catela C, Salimova E, Huth M, Berno V, Rosenthal N, et al. Distinct roles for cell-  
462 autonomous Notch signaling in cardiomyocytes of the embryonic and adult heart. *Circ Res.* 2010;106(3):559-  
463 72.
- 464 59. Zhao C, Guo H, Li J, Myint T, Pittman W, Yang L, et al. Numb family proteins are essential for cardiac  
465 morphogenesis and progenitor differentiation. *Development.* 2014;141(2):281-95.
- 466 60. Nowotschin S, Xenopoulos P, Schrode N, Hadjantonakis AK. A bright single-cell resolution live  
467 imaging reporter of Notch signaling in the mouse. *BMC Dev Biol.* 2013;13:15.

- 468 61. Radtke F, Wilson A, Stark G, Bauer M, van Meerwijk J, MacDonald HR, et al. Deficient T cell fate  
469 specification in mice with an induced inactivation of Notch1. *Immunity*. 1999;10(5):547-58.
- 470 62. de la Pompa JL, Wakeham A, Correia KM, Samper E, Brown S, Aguilera RJ, et al. Conservation of the  
471 Notch signalling pathway in mammalian neurogenesis. *Development*. 1997;124(6):1139-48.  
472

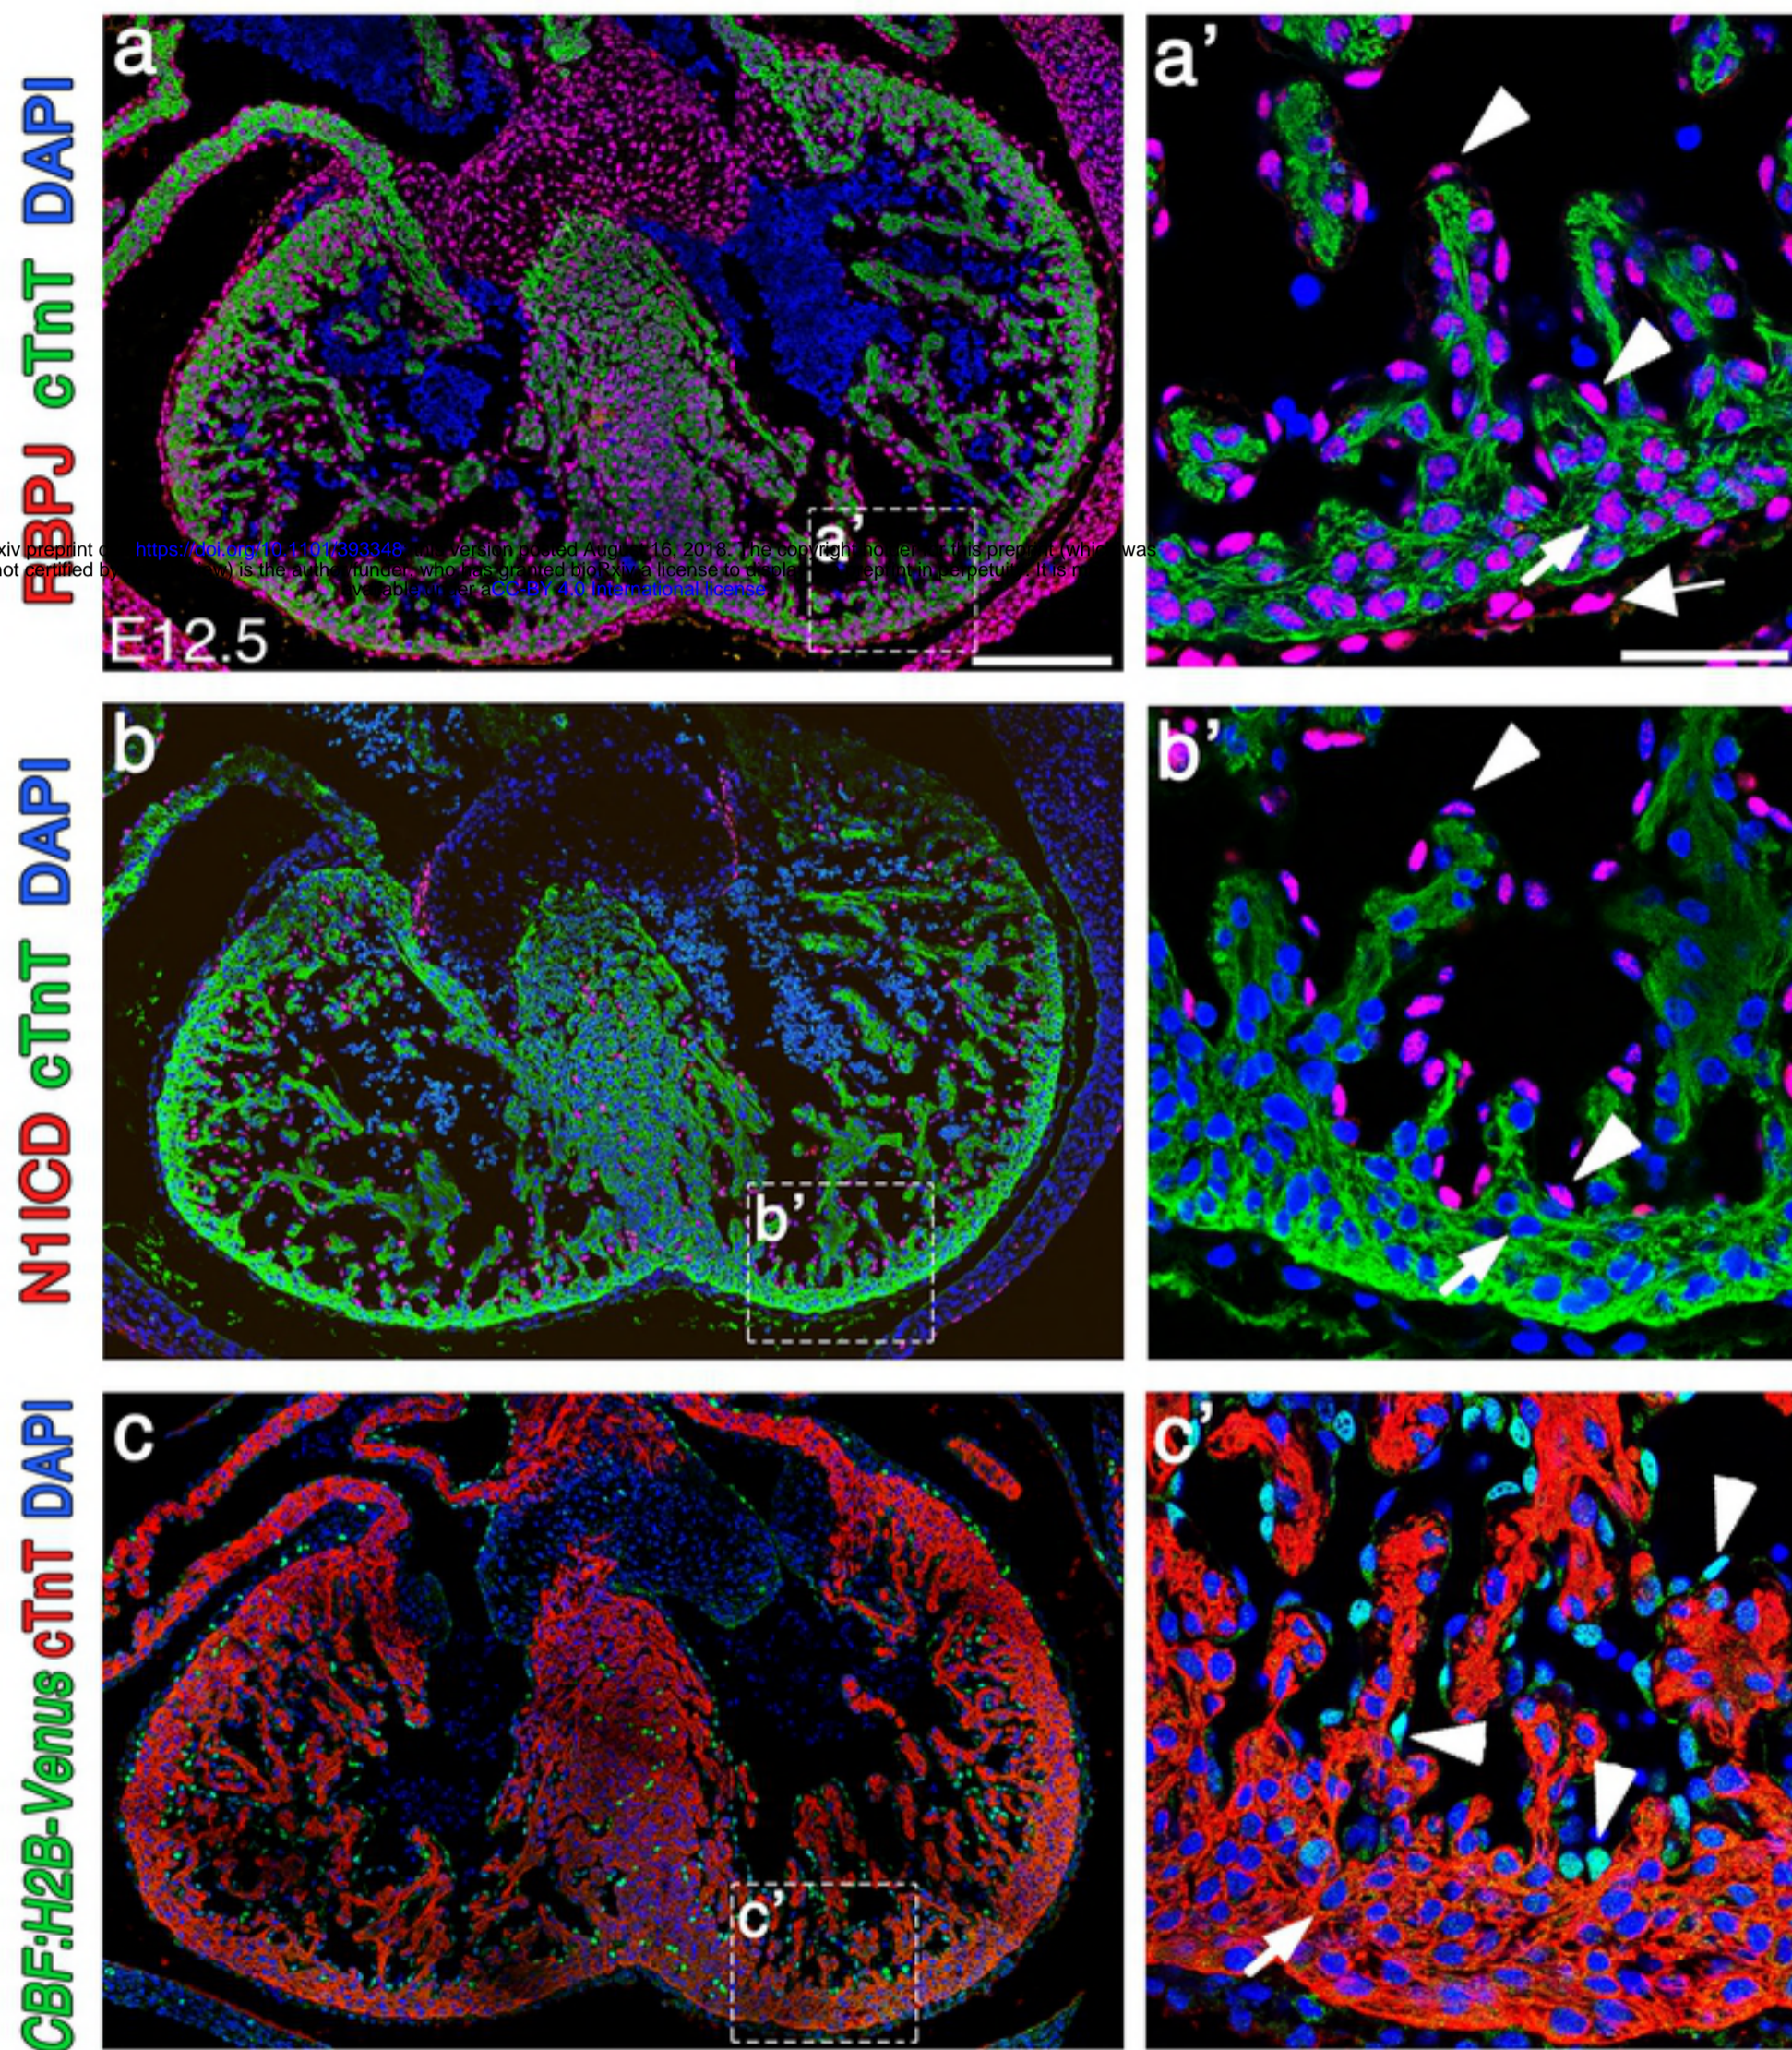

Figure 1\_Salguero-Jimenez et al.

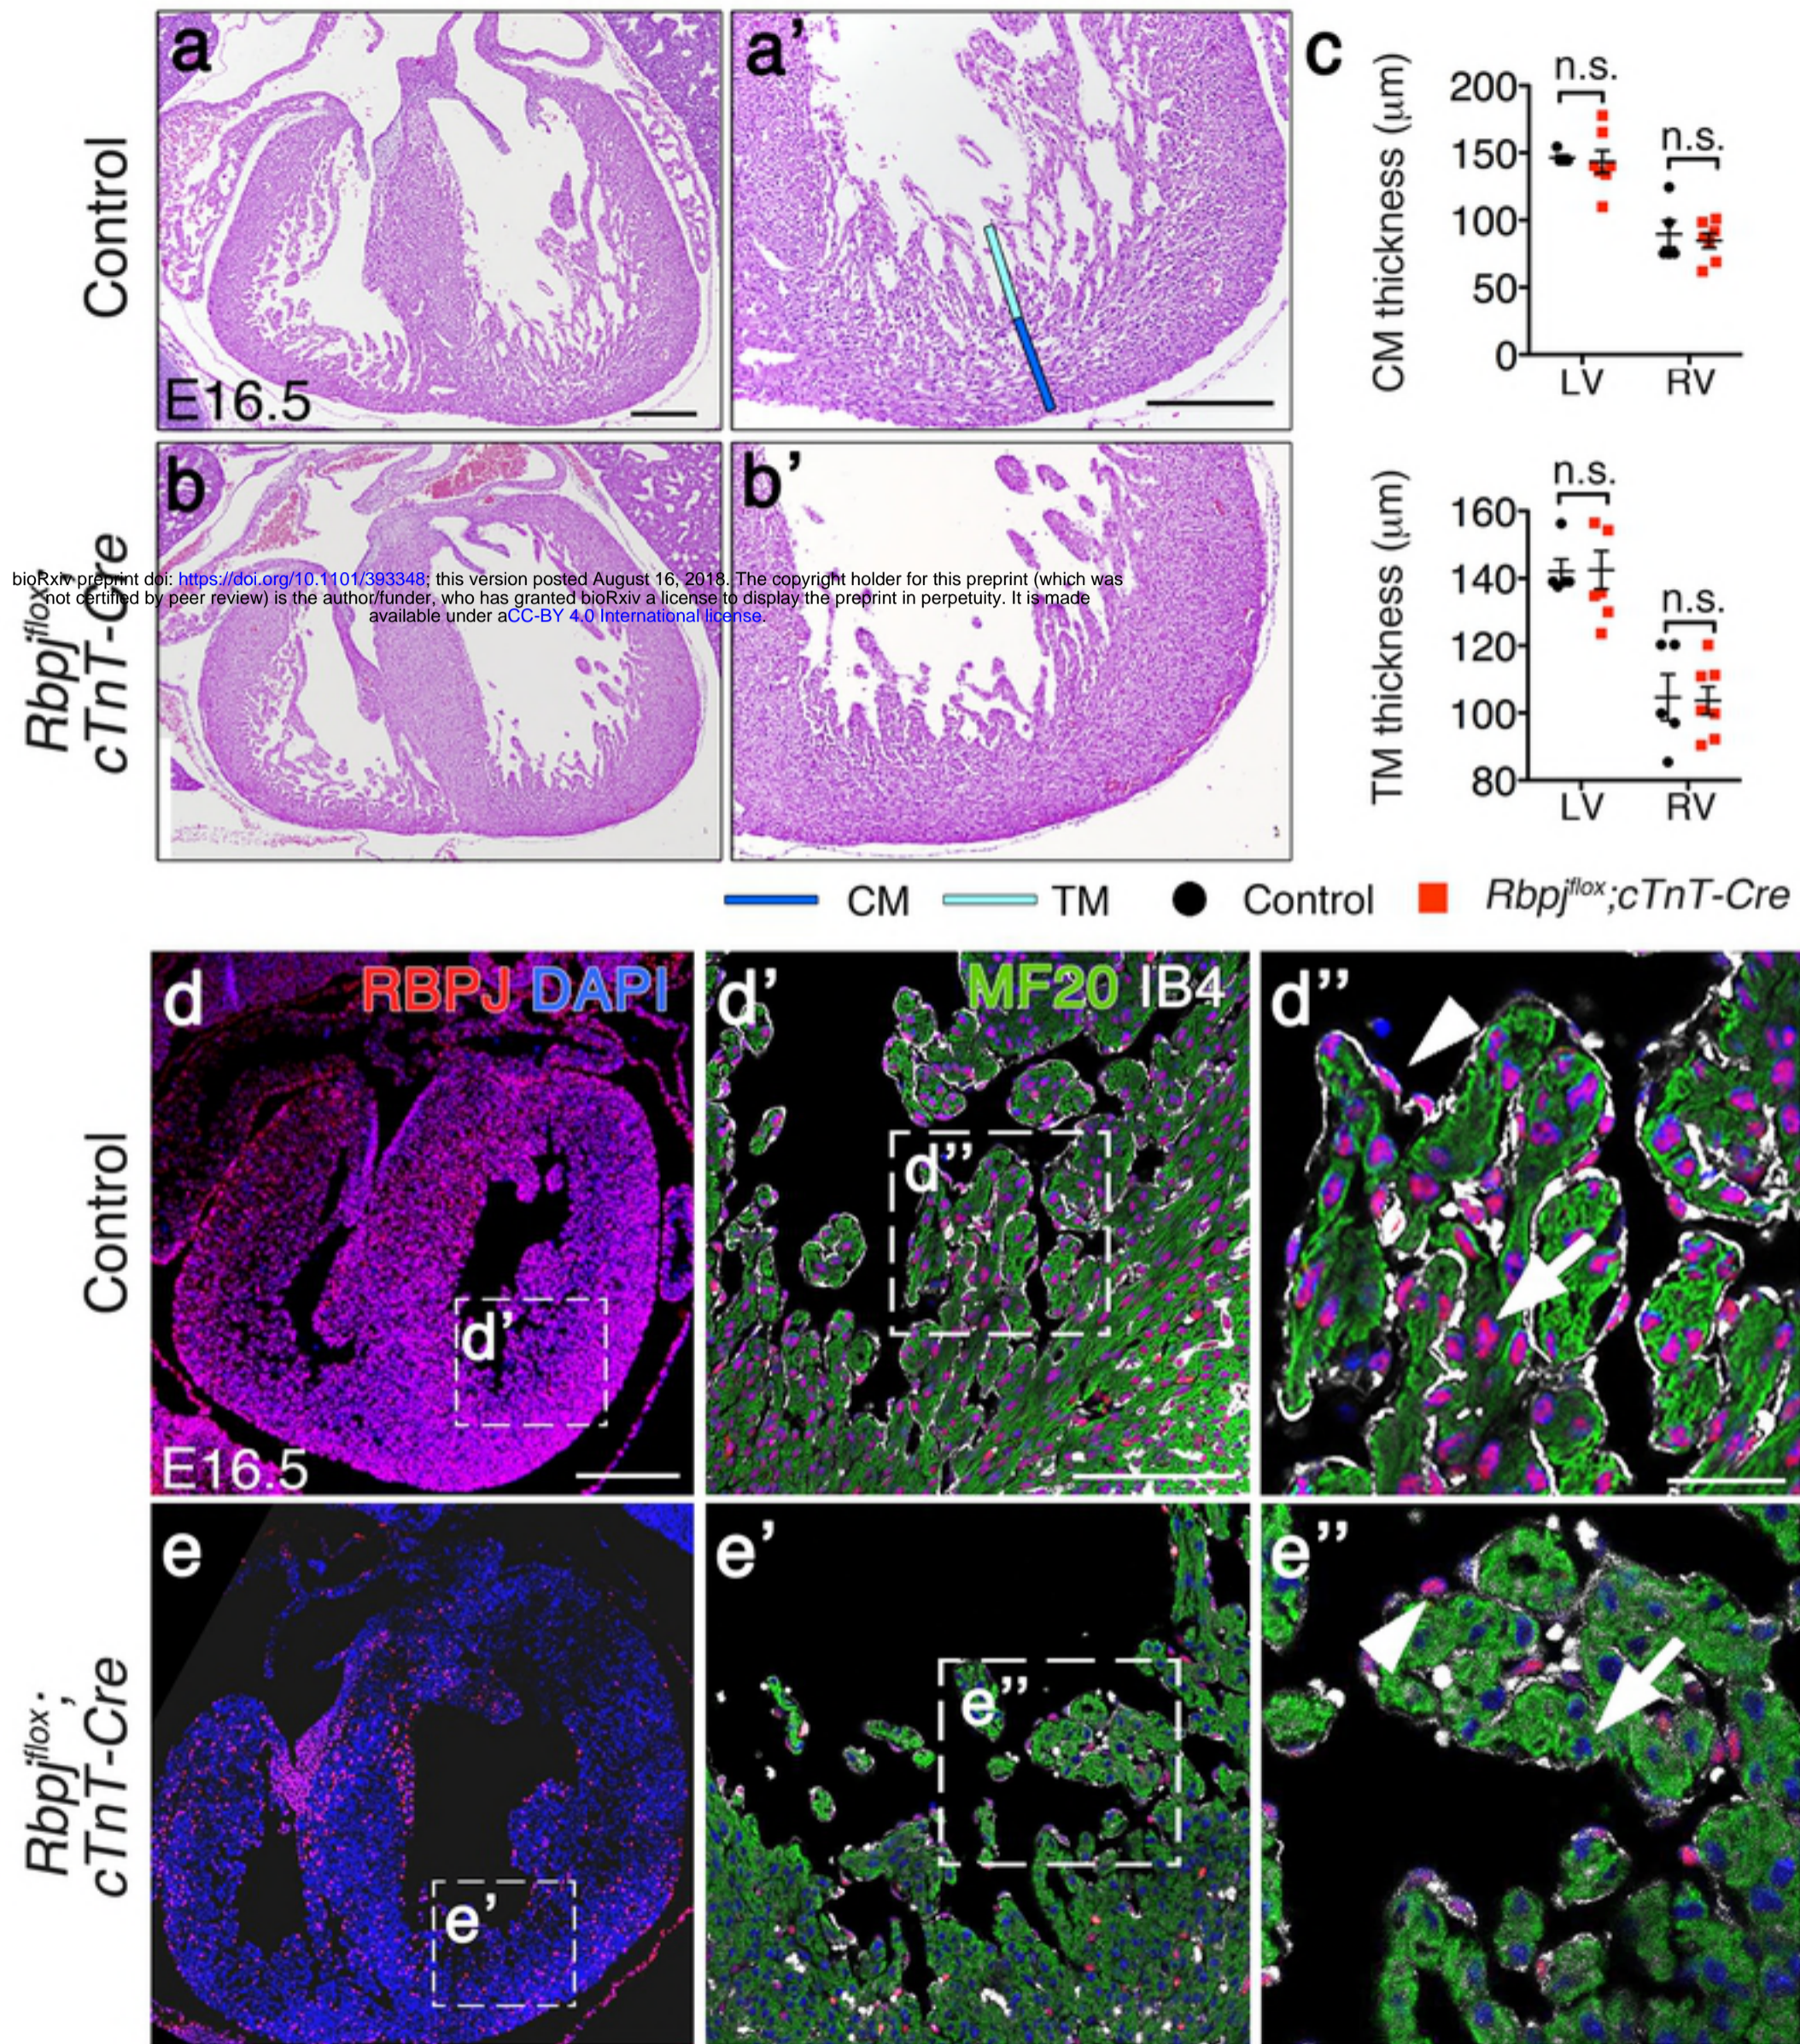

Figure 2\_Salguero-Jimenez et al.

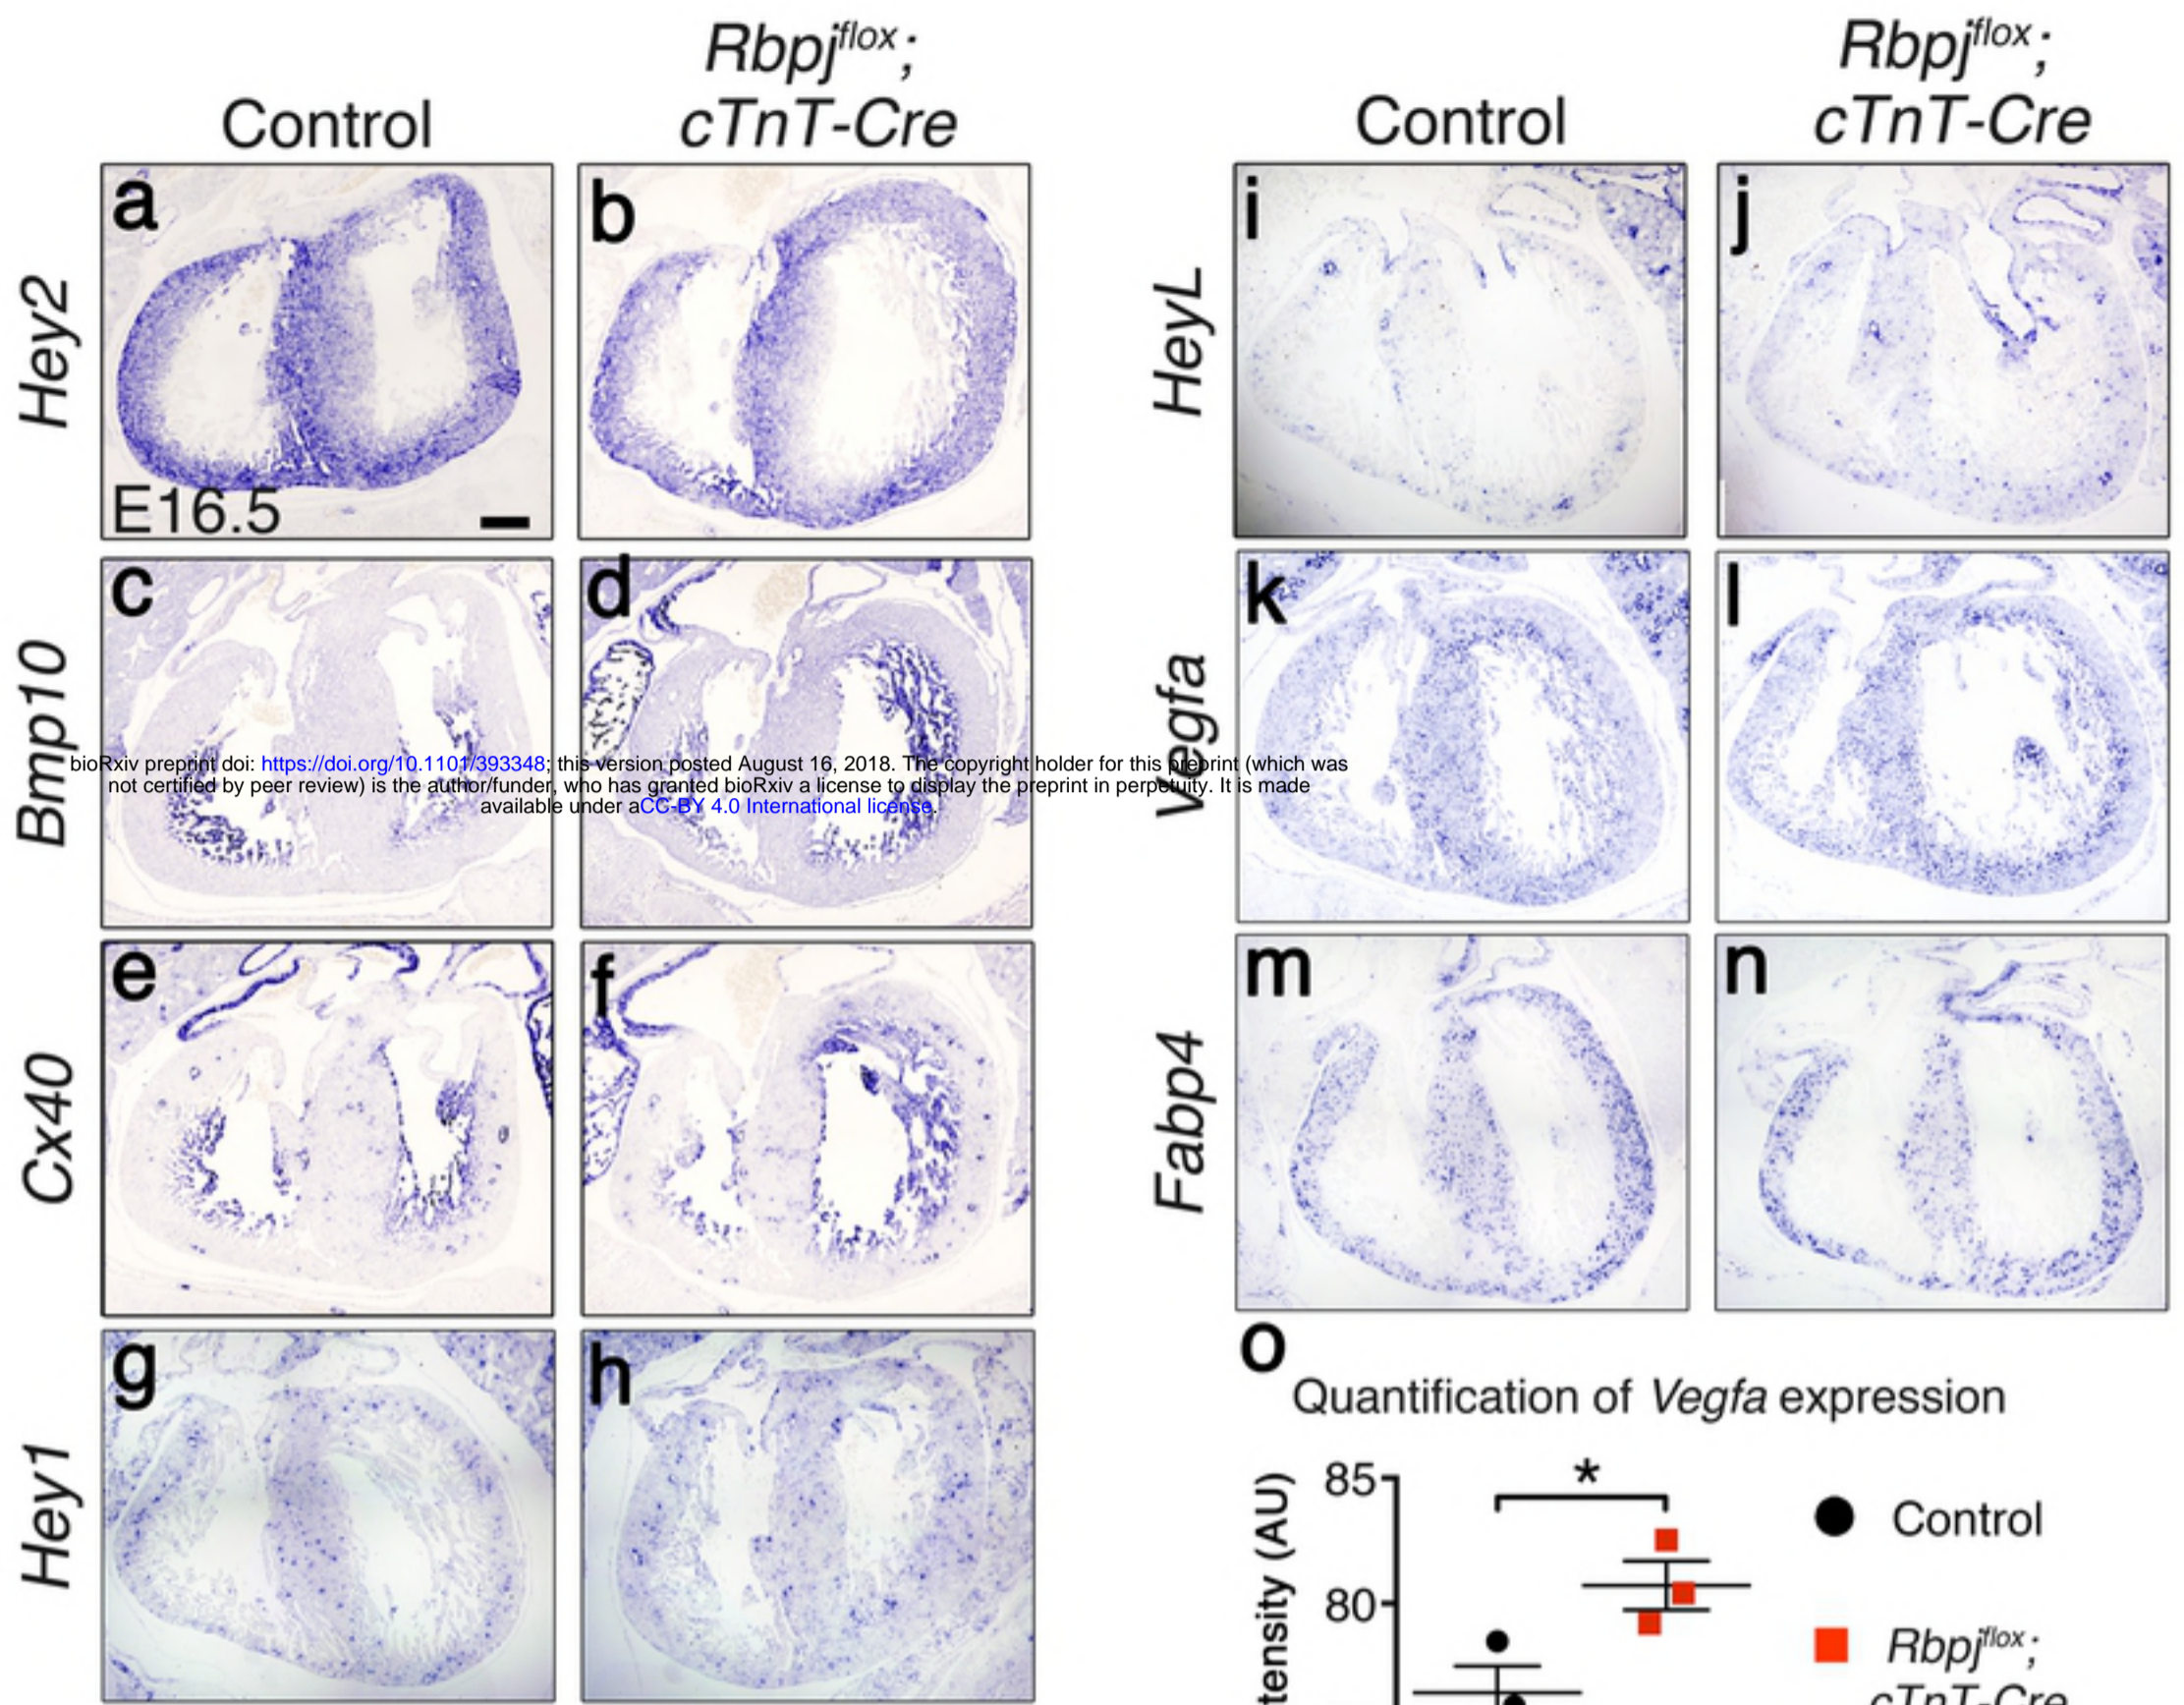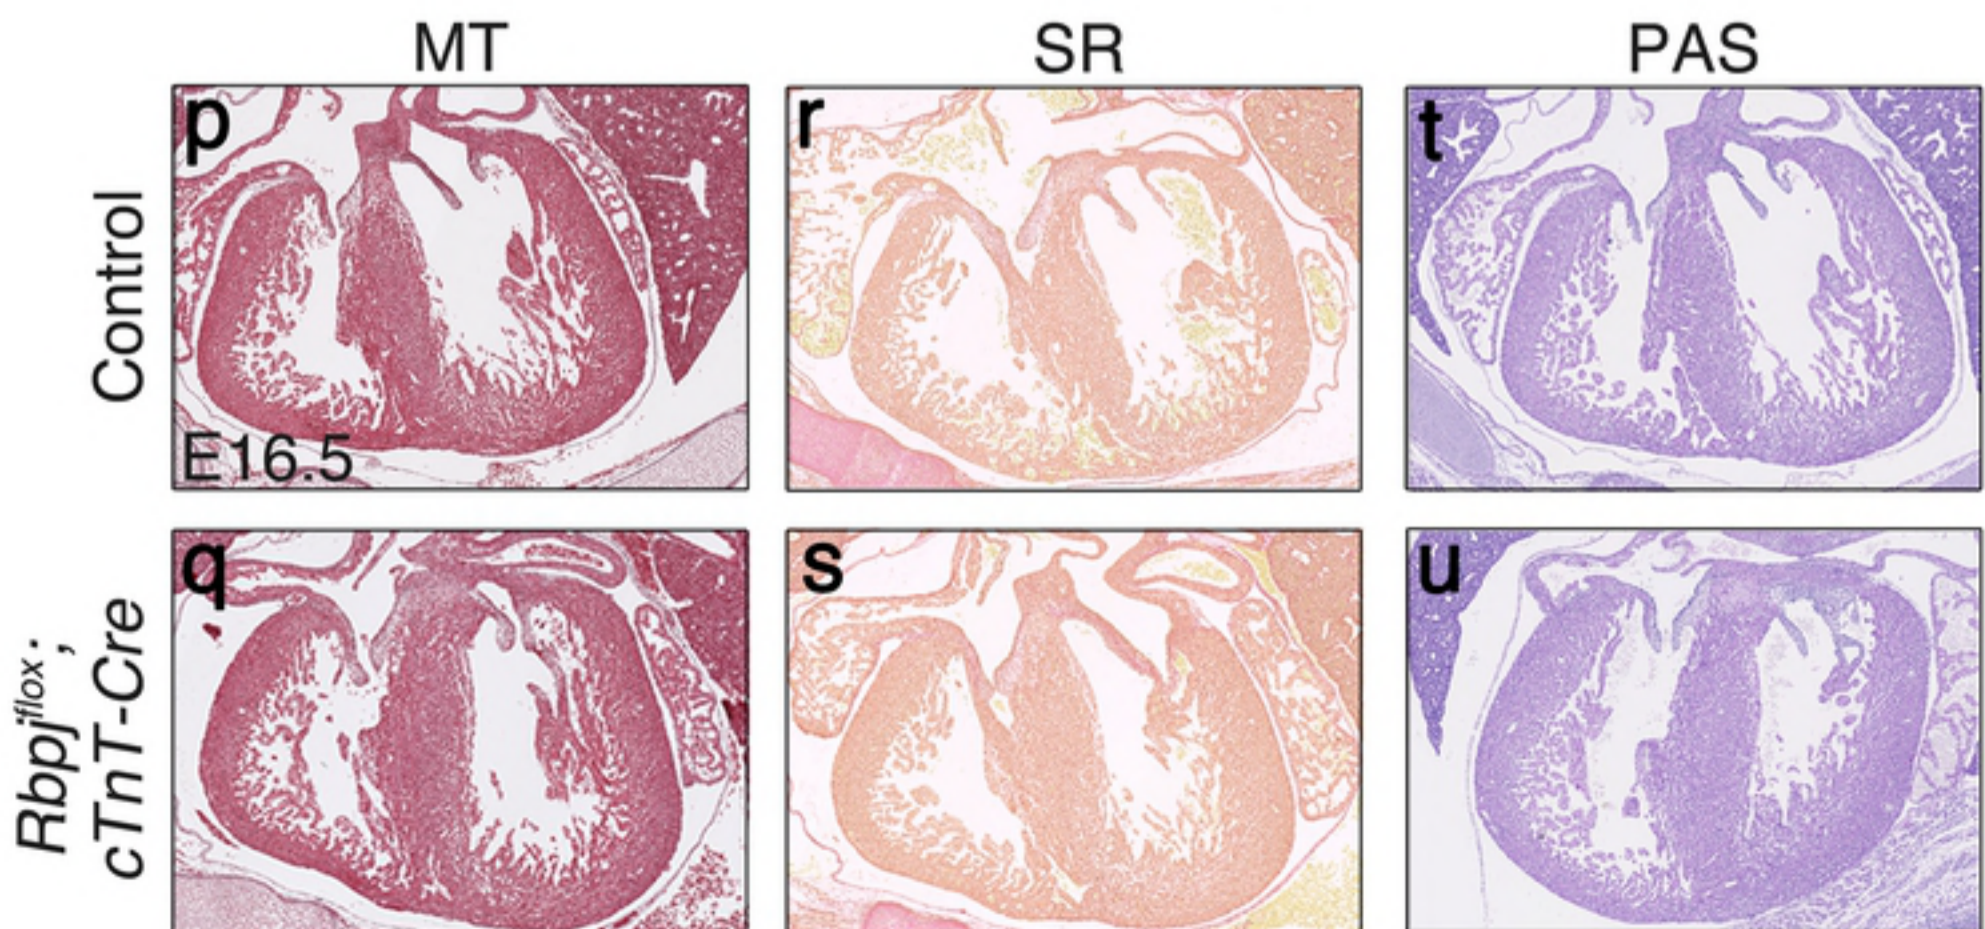

Figure 3\_Salguero-Jimenez et al.

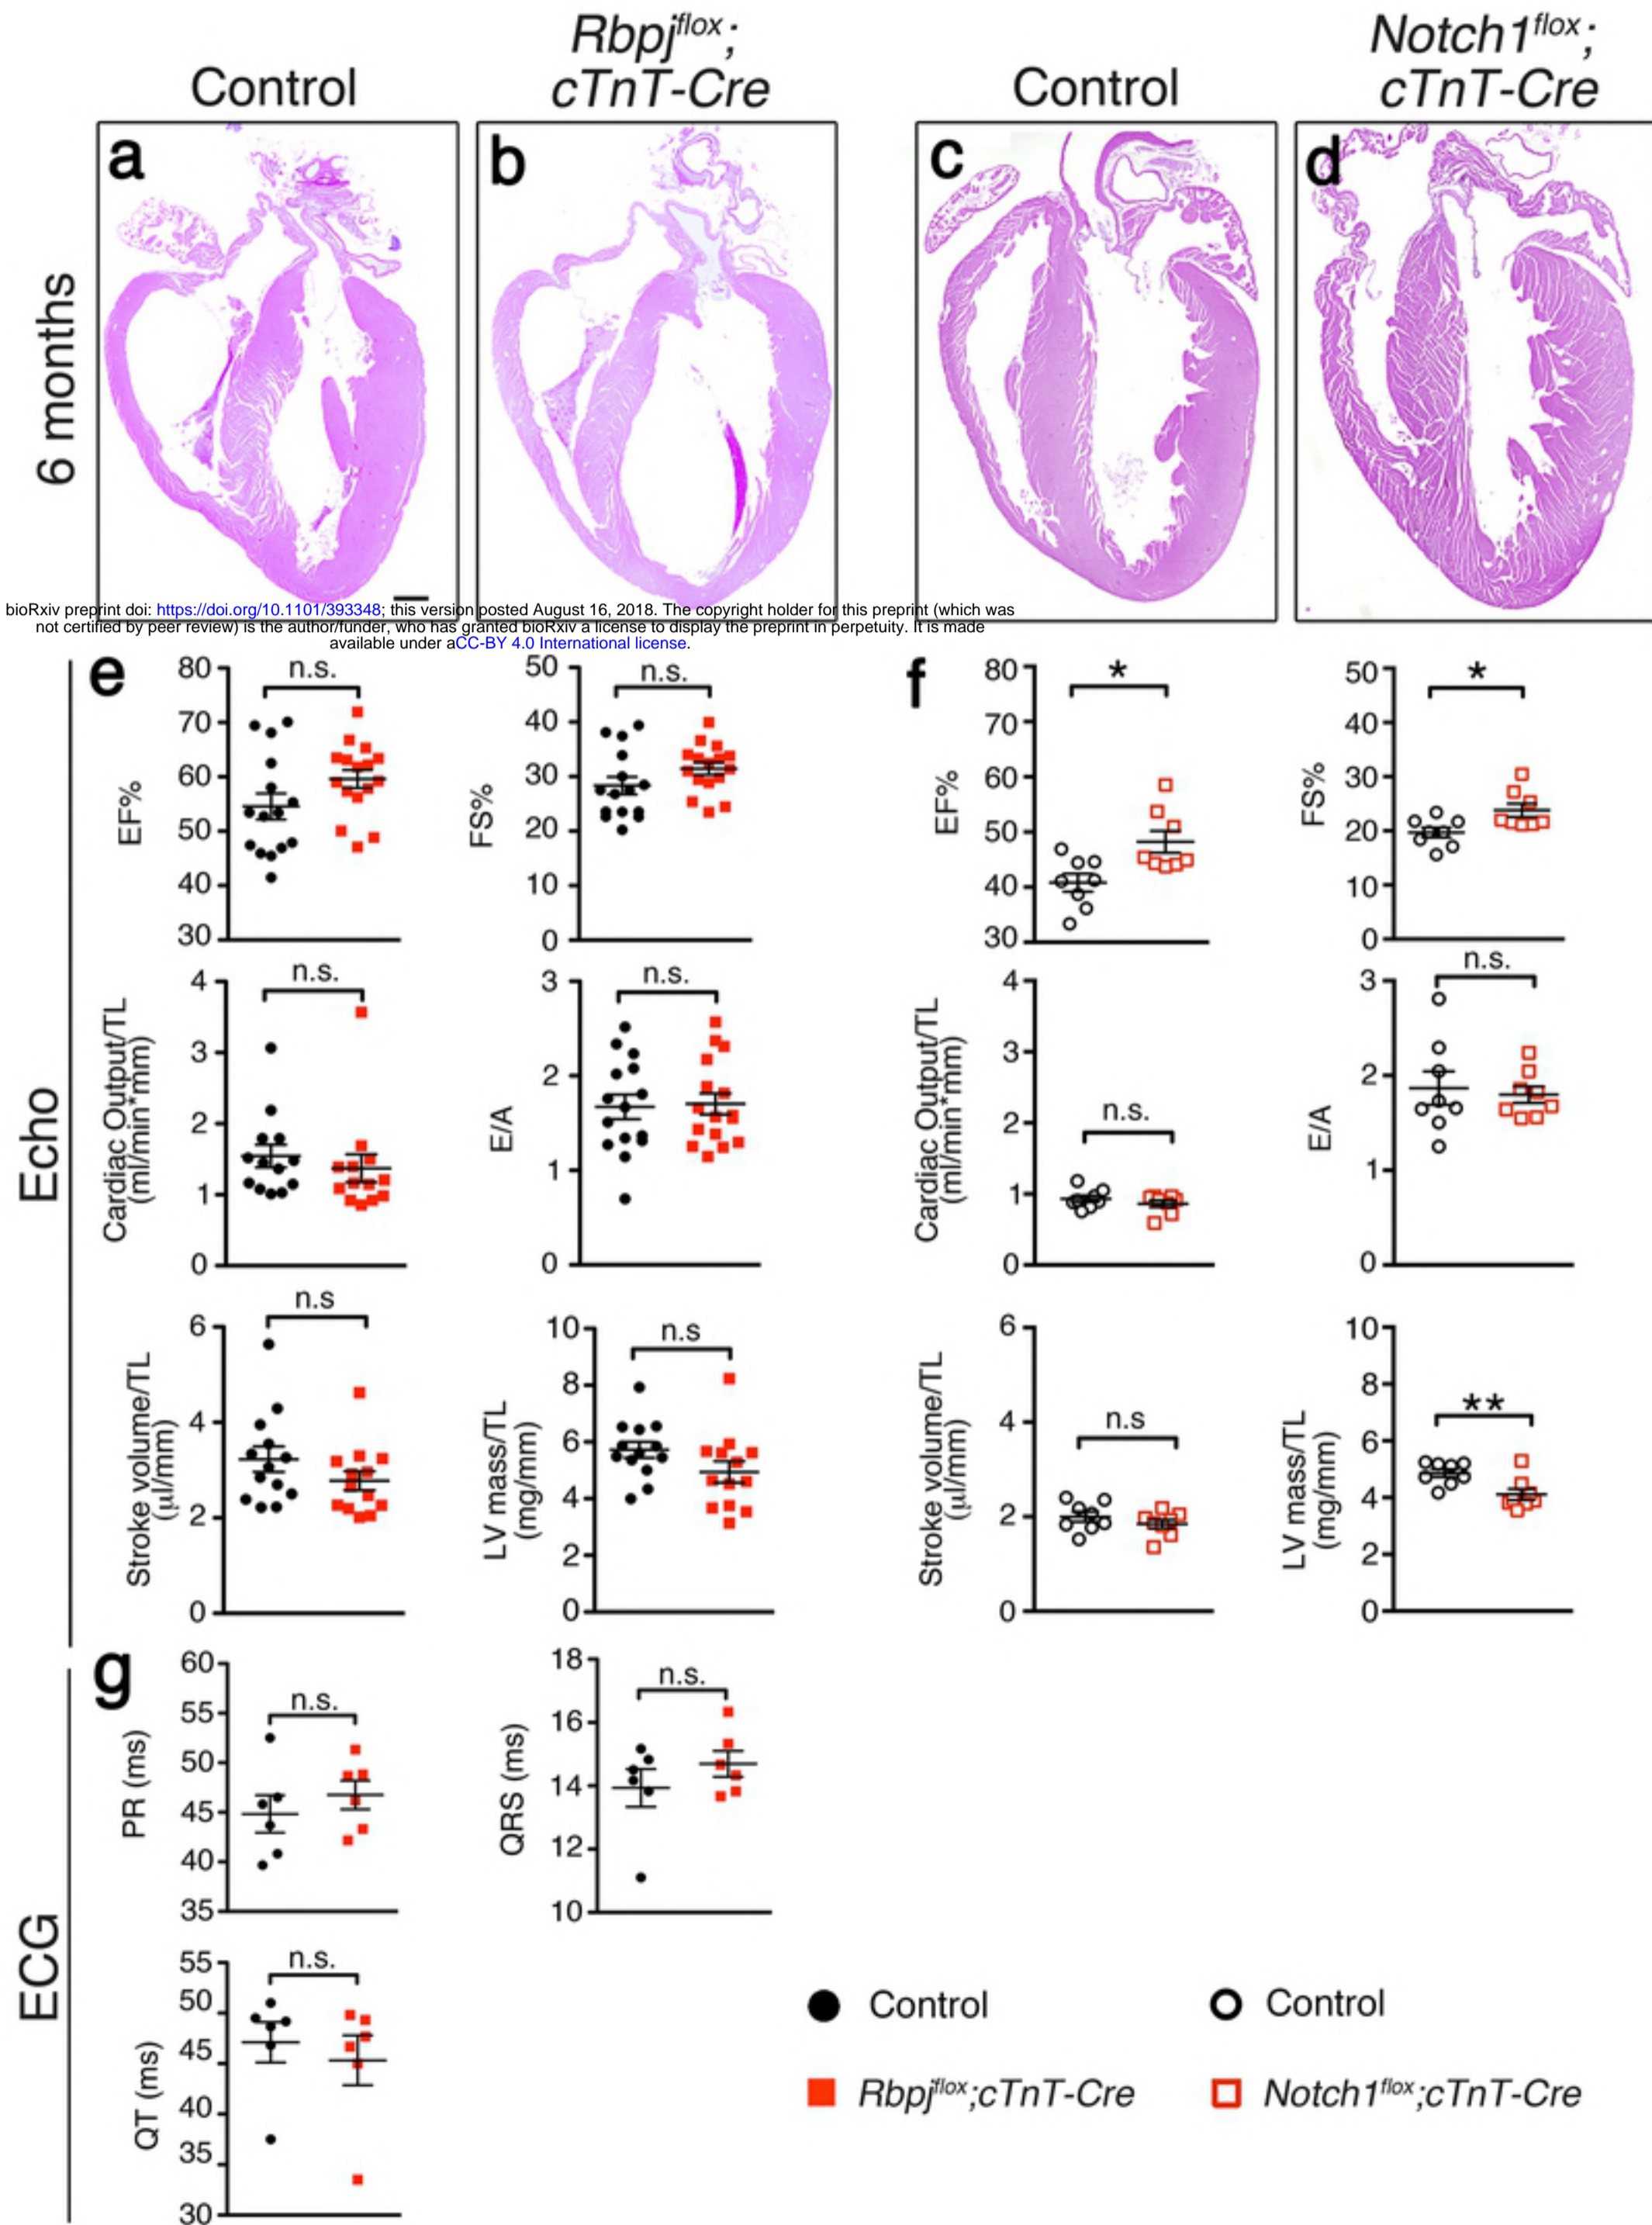

Figure 4\_Salguero-Jimenez et al.

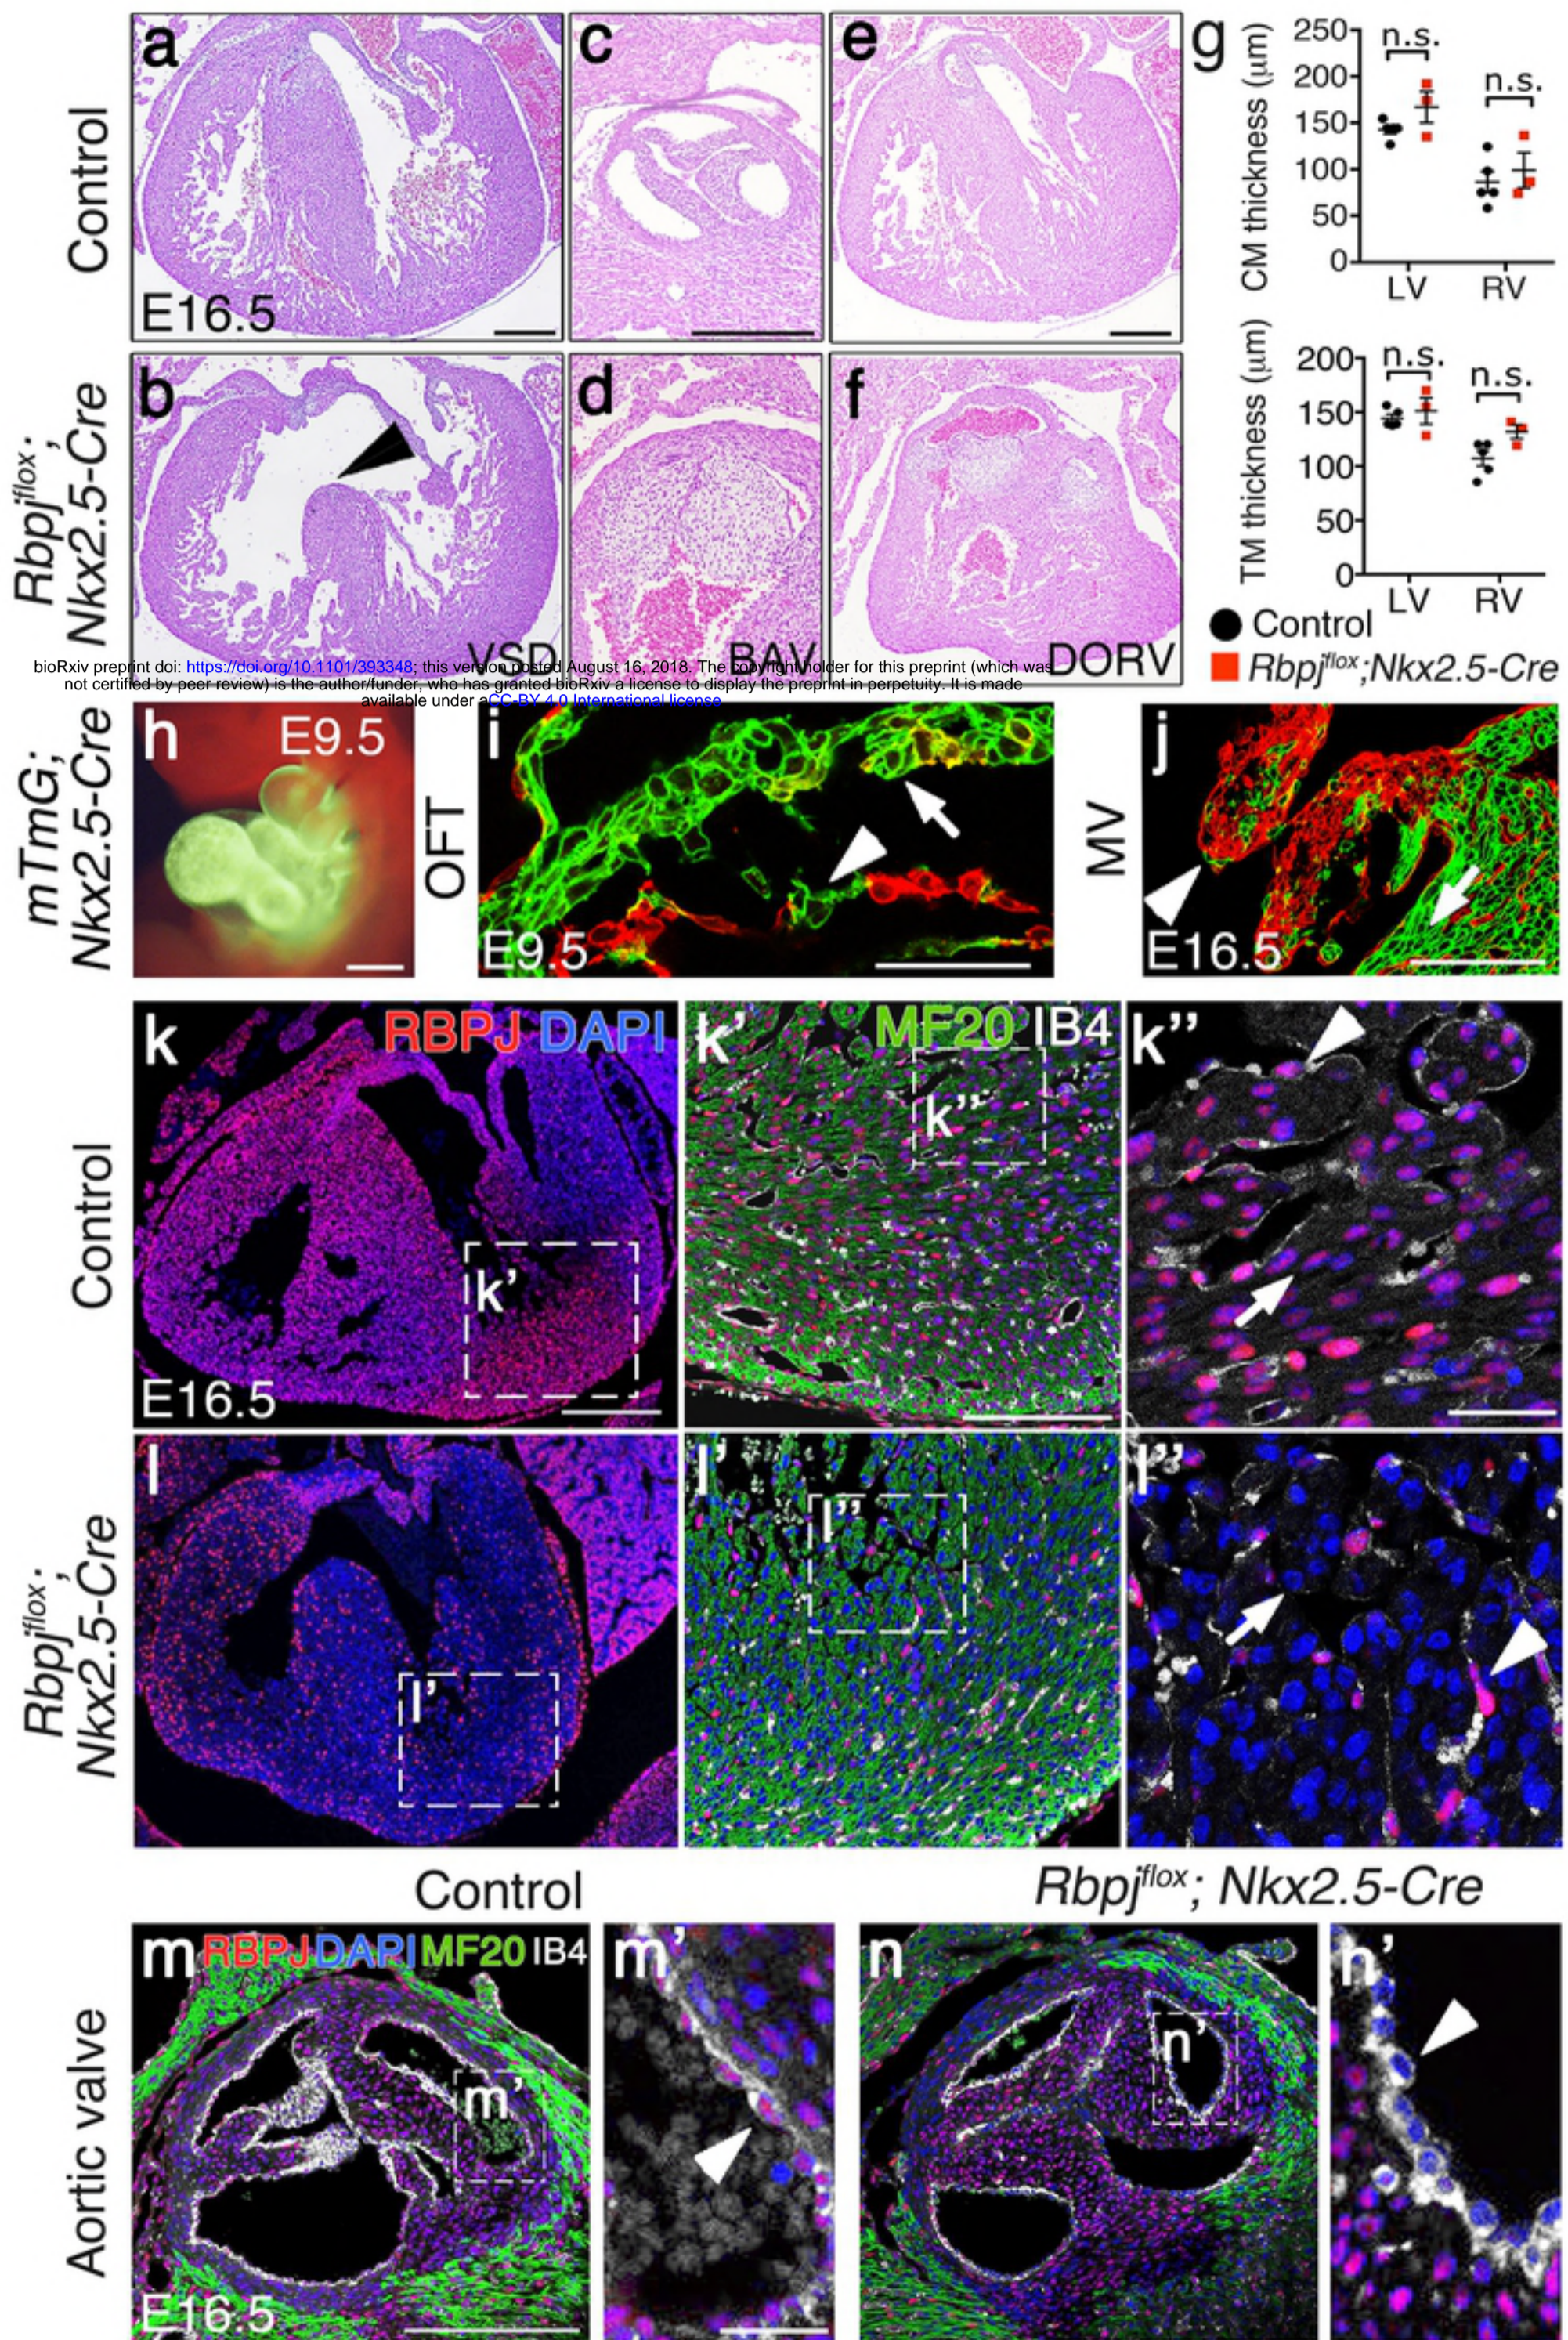

Figure 5\_Salguero-Jimenez et al.
